# Supplementary material for: Mutational Studies of the Mersacidin Leader Reveal the Function of Its Unique Two-Step Leader Processing Mechanism
Source: PubMed Central journal article supplement (PMC9127955; doi:10.1021/acssynbio.2c00088), 2022-05-03
Supplement: sb2c00088_si_001.pdf [file sb2c00088_si_001.pdf]

## Supporting information to:

**Mutational studies of the mersacidin leader reveal the function of its unique two-step leader processing mechanism.**

**Jakob H. Viel, Oscar P. Kuipers\***

Department of Molecular Genetics, University of Groningen, Nijenborgh 7, 9747 AG, Groningen, The Netherlands.

**\*Correspondence:**

Oscar P. Kuipers  
o.p.kuipers@rug.nl

**Keywords:** Mersacidin, RiPP, lanthipeptide, leader, heterologous expression, *E. coli*, mutation

## Contents

|                                                                                      |    |
|--------------------------------------------------------------------------------------|----|
| SI 1. Full amino acid sequence of all mutants .....                                  | 3  |
| SI 2. Yield determination by Tricine-Page .....                                      | 4  |
| SI 3. LC-MS analysis of mutants .....                                                | 5  |
| SI 4. Antimicrobial activity tests of all mutants.....                               | 9  |
| SI 5. Spectra of AprE cleaved mutants.....                                           | 12 |
| SI 6. Comparison of AprE digestion patterns wild type, AGDMEA and $\Delta A-1$ ..... | 23 |
| SI 7. Table of theoretical average masses .....                                      | 24 |
| SI 8. MrsT150-His cleavage analysis .....                                            | 25 |
| SI 8. List of primers used in this study .....                                       | 33 |
| References .....                                                                     | 34 |

## S1. Full amino acid sequence of all mutants

### Sequence

|          |                                  |                                                                                  |
|----------|----------------------------------|----------------------------------------------------------------------------------|
| <i>a</i> | <b>Wild type<br/>(His6-MrsA)</b> | MHHHHHHGSQEAIIRSWKDPFSRENSTQNPAGNPFSELKEAQMDKLVGAGDMEAACTFTL<br>PGGGGVCTLTSECIC  |
| <i>b</i> | pACYC E-3A<br>+ MrsM             | MHHHHHHGSQEAIIRSWKDPFSRENSTQNPAGNPFSELKEAQMDKLVGAGDMAAACTFTL<br>PGGGGVCTLTSECIC  |
| <i>c</i> | pACYC D-5A<br>+ MrsM             | MHHHHHHGSQEAIIRSWKDPFSRENSTQNPAGNPFSELKEAQMDKLVGAGAMEAACTFTL<br>PGGGGVCTLTSECIC  |
| <i>d</i> | pACYC E-3Q<br>+ MrsM             | MHHHHHHGSQEAIIRSWKDPFSRENSTQNPAGNPFSELKEAQMDKLVGAGDMAQAACTFTL<br>PGGGGVCTLTSECIC |
| <i>e</i> | pACYC D-5N<br>+ MrsM             | MHHHHHHGSQEAIIRSWKDPFSRENSTQNPAGNPFSELKEAQMDKLVGAGNMEAACTFTL<br>PGGGGVCTLTSECIC  |
| <i>f</i> | pACYC E-3A<br>D-5A + MrsM        | MHHHHHHGSQEAIIRSWKDPFSRENSTQNPAGNPFSELKEAQMDKLVGAGAMAACTFTL<br>PGGGGVCTLTSECIC   |
| <i>g</i> | pACYC E-3Q<br>N-5A + MrsM        | MHHHHHHGSQEAIIRSWKDPFSRENSTQNPAGNPFSELKEAQMDKLVGAGNMQAACTFTL<br>PGGGGVCTLTSECIC  |
| <i>h</i> | pACYC E-3K<br>+ MrsM             | MHHHHHHGSQEAIIRSWKDPFSRENSTQNPAGNPFSELKEAQMDKLVGAGDMKAACTFTL<br>PGGGGVCTLTSECIC  |
| <i>i</i> | pACYC D-5K<br>+ MrsM             | MHHHHHHGSQEAIIRSWKDPFSRENSTQNPAGNPFSELKEAQMDKLVGAGKMEAACTFTL<br>PGGGGVCTLTSECIC  |
| <i>j</i> | pACYC<br>AGDMEA +<br>MrsM        | MHHHHHHGSQEAIIRSWKDPFSRENSTQNPAGNPFSELKEAQMDKLVGAAGDMEAACTFTL<br>PGGGGVCTLTSECIC |
| <i>k</i> | pACYC<br>DMEAAA +<br>MrsM        | MHHHHHHGSQEAIIRSWKDPFSRENSTQNPAGNPFSELKEAQMDKLVGADMEAACTFTL<br>PGGGGVCTLTSECIC   |
| <i>l</i> | pACYC<br>ΔDMEA +<br>MrsM         | MHHHHHHGSQEAIIRSWKDPFSRENSTQNPAGNPFSELKEAQMDKLVGAGACTFTL<br>PGGGGVCTLTSECIC      |
| <i>m</i> | pACYC<br>ΔDMEAA +<br>MrsM        | MHHHHHHGSQEAIIRSWKDPFSRENSTQNPAGNPFSELKEAQMDKLVGAGCTFTL<br>PGGGGVCTLTSECIC       |
| <i>n</i> | pACYC<br>ΔGDMEAA +<br>MrsM       | MHHHHHHGSQEAIIRSWKDPFSRENSTQNPAGNPFSELKEAQMDKLVGACTFTL<br>PGGGGVCTLTSECIC        |
| <i>o</i> | pACYC ΔA-1<br>+ MrsM             | MHHHHHHGSQEAIIRSWKDPFSRENSTQNPAGNPFSELKEAQMDKLVGAGDMEAACTFTL<br>PGGGGVCTLTSECIC  |
| <i>p</i> | pACYC ΔG-6<br>+ MrsM             | MHHHHHHGSQEAIIRSWKDPFSRENSTQNPAGNPFSELKEAQMDKLVGADMEAACTFTL<br>PGGGGVCTLTSECIC   |
| <i>q</i> | pACYC ΔK-11<br>+ MrsM            | MHHHHHHGSQEAIIRSWKDPFSRENSTQNPAGNPFSELKEAQMDLVGAGDMEAACTFTL<br>PGGGGVCTLTSECIC   |
| <i>r</i> | pACYC ΔE-16<br>+ MrsM            | MHHHHHHGSQEAIIRSWKDPFSRENSTQNPAGNPFSELKAQMDKLVGAGDMEAACTFTL<br>PGGGGVCTLTSECIC   |
| <i>s</i> | pACYC ΔF-21<br>+ MrsM            | MHHHHHHGSQEAIIRSWKDPFSRENSTQNPAGNPFSELKEAQMDKLVGAGDMEAACTFTL<br>PGGGGVCTLTSECIC  |
| <i>t</i> | pACYC K-11A<br>+ MrsM            | MHHHHHHGSQEAIIRSWKDPFSRENSTQNPAGNPFSELKEAQMDALVAGDMEAACTFTL<br>PGGGGVCTLTSECIC   |
| <i>u</i> | pACYC E-16A<br>+ MrsM            | MHHHHHHGSQEAIIRSWKDPFSRENSTQNPAGNPFSELKAAQMDKLVGAGDMEAACTFTL<br>PGGGGVCTLTSECIC  |
| <i>v</i> | pACYC F-21A<br>+ MrsM            | MHHHHHHGSQEAIIRSWKDPFSRENSTQNPAGNPASELKEAQMDKLVGAGDMEAACTFTL<br>PGGGGVCTLTSECIC  |

## S2. Yield determination by Tricine-Page

The freeze-dried C-18 elution fraction of each peptide was dissolved in 150  $\mu$ L of Milli-Q water, 4  $\mu$ L of this solution was run on gel. Thus, effectively 8 mL of expression culture was run per well in case of 100 % purification efficiency. Non annotated wells contain peptides not discussed in this study.

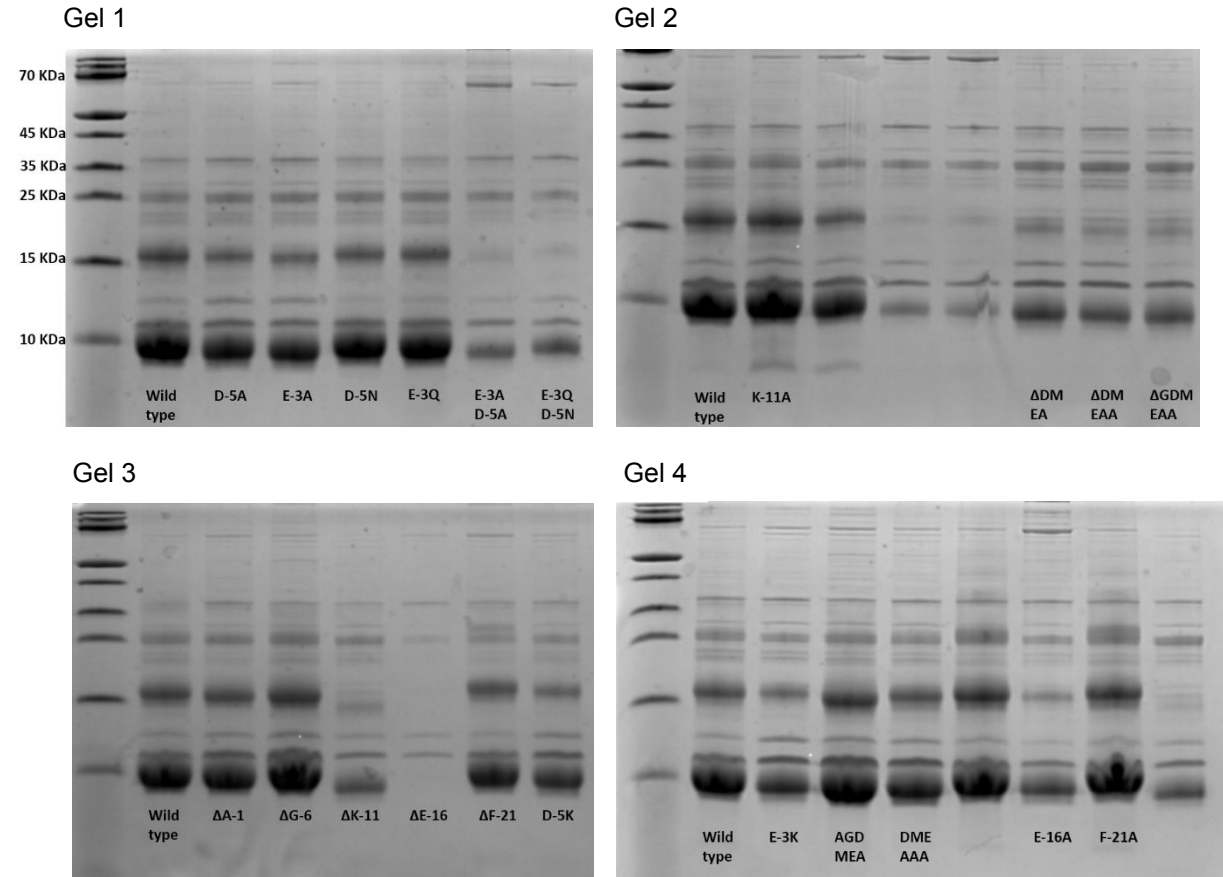

### S3. LC-MS analysis of mutants

All masses are the MrsD decarboxylated masses

|          | Mutant    | Spectrum | -H <sub>2</sub> O | Mono-isotopic mass (Da) |                                                                                           |
|----------|-----------|----------|-------------------|-------------------------|-------------------------------------------------------------------------------------------|
| <b>a</b> | Wild type |          | 0                 | 8057,70                 |                                                                                           |
|          |           |          | 1                 | 8039,69                 |                                                                                           |
|          |           |          | 2                 | 8021,68                 |                                                                                           |
|          |           |          | 3                 | 8003,67                 |                                                                                           |
|          |           |          | 4                 | 7985,66                 |                                                                                           |
|          |           |          | 5                 | 7967,65                 |                                                                                           |
| <b>b</b> | D-5A      |          | 0                 | 7999,69                 |                                                                                           |
|          |           |          | 1                 | 7981,68                 |                                                                                           |
|          |           |          | 2                 | 7963,67                 |                                                                                           |
|          |           |          | 3                 | 7945,66                 |                                                                                           |
|          |           |          | 4                 | 7927,65                 |                                                                                           |
|          |           |          | 5                 | 7909,64                 |                                                                                           |
| <b>c</b> | E-3A      |          | 0                 | 8013,71                 |                                                                                           |
|          |           |          | 1                 | 7995,70                 |                                                                                           |
|          |           |          | 2                 | 7977,69                 |                                                                                           |
|          |           |          | 3                 | 7959,68                 |                                                                                           |
|          |           |          | 4                 | 7941,67                 |                                                                                           |
|          |           |          | 5                 | 7923,66                 |                                                                                           |
| <b>d</b> | D-5N      |          | 0                 | 8056,71                 |                                                                                           |
|          |           |          | 1                 | 8038,70                 |                                                                                           |
|          |           |          | 2                 | 8020,69                 |                                                                                           |
|          |           |          | 3                 | 8002,68                 |                                                                                           |
|          |           |          | 4                 | 7984,67                 |                                                                                           |
|          |           |          | 5                 | 7966,66                 |                                                                                           |
| <b>e</b> | E-3Q      |          | 0                 | 8056,71                 |                                                                                           |
|          |           |          | 1                 | 8038,70                 |                                                                                           |
|          |           |          | 2                 | 8020,69                 |                                                                                           |
|          |           |          | 3                 | 8002,68                 |                                                                                           |
|          |           |          | 4                 | 7984,67                 |                                                                                           |
|          |           |          | 5                 | 7966,66                 |                                                                                           |
| <b>f</b> | E-3A D5A  |          | 0                 | 7955,70                 | Mostly -3 H <sub>2</sub> O - 2H <sup>+</sup> , with trace amounts of -4 H <sub>2</sub> O. |
|          |           |          | 1                 | 7937,69                 |                                                                                           |
|          |           |          | 2                 | 7919,68                 |                                                                                           |
|          |           |          | 3                 | 7901,67                 |                                                                                           |
|          |           |          | 4                 | 7883,66                 |                                                                                           |
|          |           |          | 5                 | 7865,65                 |                                                                                           |
| <b>g</b> | E-3Q D5N  |          | 0                 | 8055,73                 | Mostly -3 H <sub>2</sub> O - 2H <sup>+</sup> , with trace amounts of -4 H <sub>2</sub> O. |
|          |           |          | 1                 | 8037,72                 |                                                                                           |
|          |           |          | 2                 | 8019,71                 |                                                                                           |
|          |           |          | 3                 | 8001,70                 |                                                                                           |
|          |           |          | 4                 | 7983,69                 |                                                                                           |
|          |           |          | 5                 | 7965,68                 |                                                                                           |

|          | Mutant  | Spectrum | - H <sub>2</sub> O | Mono-isotopic mass (Da) |                                                                                           |
|----------|---------|----------|--------------------|-------------------------|-------------------------------------------------------------------------------------------|
| <i>h</i> | E-3K    |          | 0                  | 8056,75                 | -5 H <sub>2</sub> O undetectable, but antimicrobial activity shows its presence           |
|          |         |          | 1                  | 8038,74                 |                                                                                           |
|          |         |          | 2                  | 8020,73                 |                                                                                           |
|          |         |          | 3                  | 8002,72                 |                                                                                           |
|          |         |          | 4                  | 7984,71                 |                                                                                           |
|          |         |          | 5                  | 7966,70                 |                                                                                           |
| <i>i</i> | D-5K    |          | 0                  | 8070,77                 | -5 H <sub>2</sub> O undetectable, but antimicrobial activity shows its presence           |
|          |         |          | 1                  | 8052,76                 |                                                                                           |
|          |         |          | 2                  | 8034,75                 |                                                                                           |
|          |         |          | 3                  | 8016,73                 |                                                                                           |
|          |         |          | 4                  | 7998,72                 |                                                                                           |
|          |         |          | 5                  | 7980,71                 |                                                                                           |
| <i>j</i> | AGDMEA  |          | 0                  | 8057,70                 | Fully dehydrated, but at least one ring is not formed.                                    |
|          |         |          | 1                  | 8039,69                 |                                                                                           |
|          |         |          | 2                  | 8021,68                 |                                                                                           |
|          |         |          | 3                  | 8003,67                 |                                                                                           |
|          |         |          | 4                  | 7985,66                 |                                                                                           |
|          |         |          | 5                  | 7967,65                 |                                                                                           |
| <i>k</i> | DMEAAA  |          | 0                  | 8071,71                 | At most -3 H <sub>2</sub> O, with trace amounts of -4 H <sub>2</sub> O.                   |
|          |         |          | 1                  | 8053,70                 |                                                                                           |
|          |         |          | 2                  | 8035,69                 |                                                                                           |
|          |         |          | 3                  | 8017,68                 |                                                                                           |
|          |         |          | 4                  | 7999,67                 |                                                                                           |
|          |         |          | 5                  | 7981,66                 |                                                                                           |
| <i>l</i> | ΔDMEA   |          | 0                  | 7611,55                 | Mostly -3 H <sub>2</sub> O - 2H <sup>+</sup> , with trace amounts of -4 H <sub>2</sub> O. |
|          |         |          | 1                  | 7593,54                 |                                                                                           |
|          |         |          | 2                  | 7575,53                 |                                                                                           |
|          |         |          | 3                  | 7557,52                 |                                                                                           |
|          |         |          | 4                  | 7539,51                 |                                                                                           |
|          |         |          | 5                  | 7521,50                 |                                                                                           |
| <i>m</i> | ΔDMEAA  |          | 0                  | 7540,51                 | Mostly -3 H <sub>2</sub> O - 2H <sup>+</sup>                                              |
|          |         |          | 1                  | 7522,50                 |                                                                                           |
|          |         |          | 2                  | 7504,49                 |                                                                                           |
|          |         |          | 3                  | 7486,48                 |                                                                                           |
|          |         |          | 4                  | 7468,47                 |                                                                                           |
|          |         |          | 5                  | 7450,46                 |                                                                                           |
| <i>n</i> | ΔGDMEAA |          | 0                  | 7483,49                 | Mostly -3 H <sub>2</sub> O - 2H <sup>+</sup> , with trace amounts of -4 H <sub>2</sub> O. |
|          |         |          | 1                  | 7465,48                 |                                                                                           |
|          |         |          | 2                  | 7447,47                 |                                                                                           |
|          |         |          | 3                  | 7429,46                 |                                                                                           |
|          |         |          | 4                  | 7411,45                 |                                                                                           |
|          |         |          | 5                  | 7393,44                 |                                                                                           |

|   | Mutant | Spectrum | -H <sub>2</sub> O | Mono-isotopic mass (Da) |                                                                                 |
|---|--------|----------|-------------------|-------------------------|---------------------------------------------------------------------------------|
| o | ΔA-1   |          | 0                 | 7986,66                 | Fully dehydrated, but at least one ring is not formed.                          |
|   |        |          | 1                 | 7968,65                 |                                                                                 |
|   |        |          | 2                 | 7950,64                 |                                                                                 |
|   |        |          | 3                 | 7932,63                 |                                                                                 |
|   |        |          | 4                 | 7914,62                 |                                                                                 |
|   |        |          | 5                 | 7896,61                 |                                                                                 |
| p | ΔG-6   |          | 0                 | 8000,68                 | Production and modification as good as wild type                                |
|   |        |          | 1                 | 7982,67                 |                                                                                 |
|   |        |          | 2                 | 7964,66                 |                                                                                 |
|   |        |          | 3                 | 7946,65                 |                                                                                 |
|   |        |          | 4                 | 7928,63                 |                                                                                 |
|   |        |          | 5                 | 7910,62                 |                                                                                 |
| q | ΔK-11  |          | 0                 | 7929,60                 | Poor production and modification efficiency                                     |
|   |        |          | 1                 | 7911,59                 |                                                                                 |
|   |        |          | 2                 | 7893,58                 |                                                                                 |
|   |        |          | 3                 | 7875,57                 |                                                                                 |
|   |        |          | 4                 | 7857,56                 |                                                                                 |
|   |        |          | 5                 | 7839,55                 |                                                                                 |
| r | ΔE-16  |          | 0                 | 7928,66                 | Very poor production. No modification                                           |
|   |        |          | 1                 | 7910,65                 |                                                                                 |
|   |        |          | 2                 | 7892,63                 |                                                                                 |
|   |        |          | 3                 | 7874,62                 |                                                                                 |
|   |        |          | 4                 | 7856,61                 |                                                                                 |
|   |        |          | 5                 | 7838,60                 |                                                                                 |
| s | ΔF-21  |          | 0                 | 7910,63                 | Poor production and modification efficiency                                     |
|   |        |          | 1                 | 7892,62                 |                                                                                 |
|   |        |          | 2                 | 7874,61                 |                                                                                 |
|   |        |          | 3                 | 7856,60                 |                                                                                 |
|   |        |          | 4                 | 7838,59                 |                                                                                 |
|   |        |          | 5                 | 7820,58                 |                                                                                 |
| t | K-11A  |          | 0                 | 8000,64                 | Production and modification almost as good as wild type                         |
|   |        |          | 1                 | 7982,63                 |                                                                                 |
|   |        |          | 2                 | 7964,62                 |                                                                                 |
|   |        |          | 3                 | 7946,61                 |                                                                                 |
|   |        |          | 4                 | 7928,60                 |                                                                                 |
|   |        |          | 5                 | 7910,59                 |                                                                                 |
| u | E-16A  |          | 0                 | 7999,69                 | -5 H <sub>2</sub> O undetectable, but antimicrobial activity shows its presence |
|   |        |          | 1                 | 7981,68                 |                                                                                 |
|   |        |          | 2                 | 7963,67                 |                                                                                 |
|   |        |          | 3                 | 7945,66                 |                                                                                 |
|   |        |          | 4                 | 7927,65                 |                                                                                 |
|   |        |          | 5                 | 7909,64                 |                                                                                 |

|   | Mutant | Spectrum                                                                           | -H <sub>2</sub> O | Mono-isotopic mass (Da) |
|---|--------|------------------------------------------------------------------------------------|-------------------|-------------------------|
| V | F-21A  | 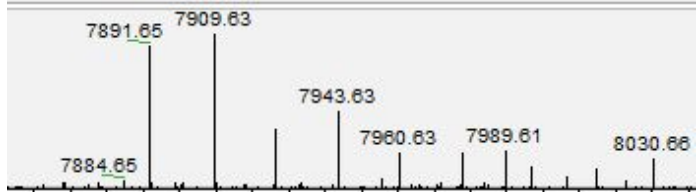 | 0                 | 7981,67                 |
|   |        |                                                                                    | 1                 | 7963,66                 |
|   |        |                                                                                    | 2                 | 7945,65                 |
|   |        |                                                                                    | 3                 | 7927,64                 |
|   |        |                                                                                    | 4                 | 7909,62                 |
|   |        |                                                                                    | 5                 | 7891,61                 |



#### S4. Antimicrobial activity tests of all mutants

To assure maximum resolution of the activity tests, all mutants were first applied in high amounts, applying yields from 16 mL of culture digested by AprE-His (plate 1-3). As a control, an AprE-His digested mixed yield from three wild type expressions was applied in an equivalent of 4 mL of culture on all plates. Also 225 ng of nisin was spotted as a positive control. Next, the mutants showing an activity high enough to be limited by diffusion were tested again (plate 4), this time using half the amount (8 mL of culture equivalent). Finally, the compounds in plate five were spotted in equal amounts as the control, namely 4 mL equivalent of expression culture.

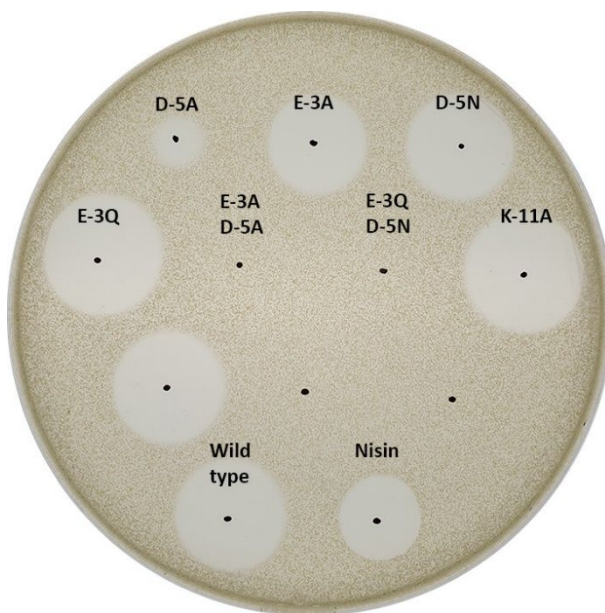

Plate 1: Mutants spotted 4:1 compared to wild type control.

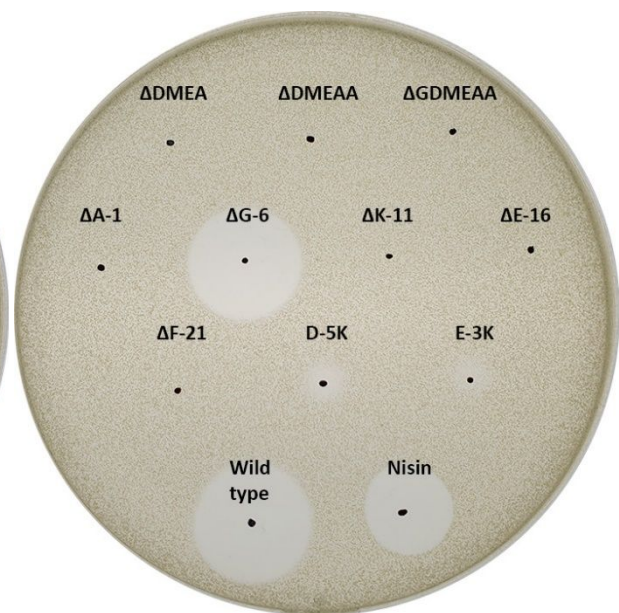

Plate 2: Mutants spotted 4:1 compared to wild type control.

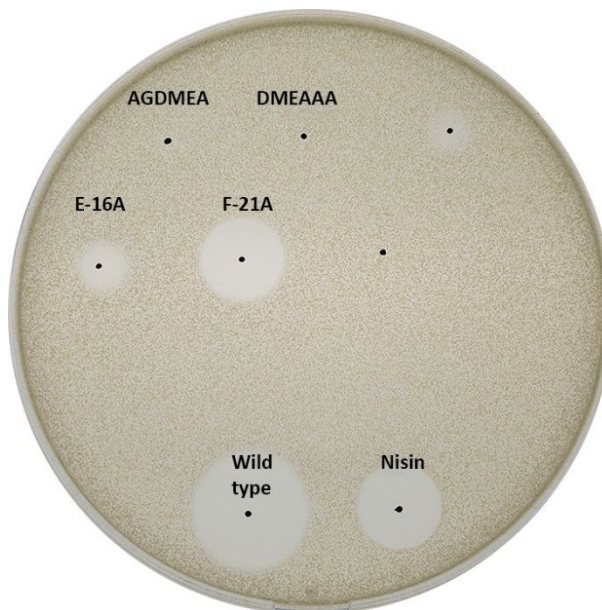

Plate 3: Mutants spotted 4:1 compared to wild type control.

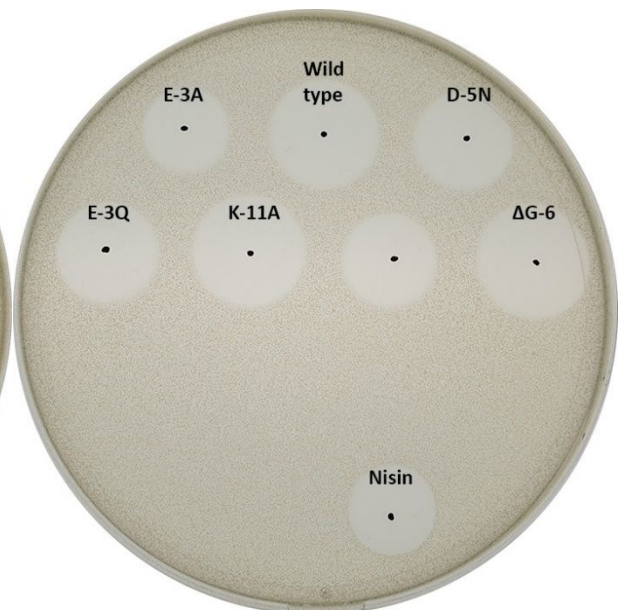

Plate 4: Mutants spotted 2:1 compared to wild type control.

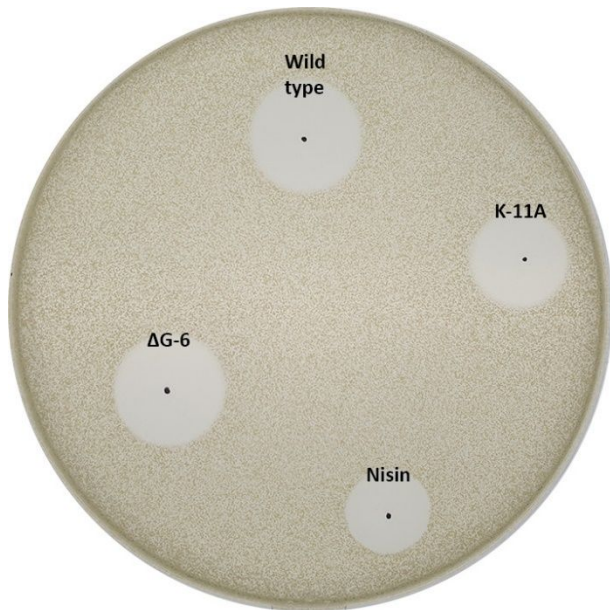

Plate 5: Mutants spotted **1:1** compared to wild type control.

To determine the relative activity, the area of each of the tested mutants was compared with that of the wild type control, which was set to 1. For mutants tested in more than one volume, the halo from the smallest spotted volume was used. The difference in surface area compared to the wild type control was directly translated to a fraction of the wild type activity. Based on this fraction, an activity rating of 0 to 5 was given based on an exponential scale best representing the differences in activity between the tested mutants (See table below).

## Relative antimicrobial activity

|          | Mutant           | Plate | Halo Diameter (cm) | Halo Area | Amount Ratio | Activity per ratio | Fraction of activity | >0 | >0,09375 | >0,1875 | >0,375 | >0,75 |
|----------|------------------|-------|--------------------|-----------|--------------|--------------------|----------------------|----|----------|---------|--------|-------|
| <i>c</i> | D-5A             | 1     | 1,98               | 3,08      | 4            | 0,77               | 0,05                 | +  |          |         |        |       |
| <i>f</i> | E-3A D-5A        | 1     | 0,00               | 0,00      | 4            | 0,00               | 0,00                 |    |          |         |        |       |
| <i>g</i> | E-3Q N-5A        | 1     | 0,00               | 0,00      | 4            | 0,00               | 0,00                 |    |          |         |        |       |
| <b>a</b> | <b>wild type</b> | 1     | 4,55               | 16,26     | 1            | 16,26              | 1,00                 |    |          |         |        |       |
| <i>l</i> | ΔDMEA            | 2     | 0,00               | 0,00      | 4            | 0,00               | 0,00                 |    |          |         |        |       |
| <i>m</i> | ΔDMEAA           | 2     | 0,00               | 0,00      | 4            | 0,00               | 0,00                 |    |          |         |        |       |
| <i>n</i> | ΔGDMEAA          | 2     | 0,00               | 0,00      | 4            | 0,00               | 0,00                 |    |          |         |        |       |
| <i>o</i> | ΔA-1             | 2     | 0,00               | 0,00      | 4            | 0,00               | 0,00                 |    |          |         |        |       |
| <i>q</i> | ΔK-11            | 2     | 0,00               | 0,00      | 4            | 0,00               | 0,00                 |    |          |         |        |       |
| <i>r</i> | ΔE-16            | 2     | 0,00               | 0,00      | 4            | 0,00               | 0,00                 |    |          |         |        |       |
| <i>s</i> | ΔF-21            | 2     | 0,00               | 0,00      | 4            | 0,00               | 0,00                 |    |          |         |        |       |
| <i>i</i> | D-5K             | 2     | 1,10               | 0,95      | 4            | 0,24               | 0,01                 | +  |          |         |        |       |
| <i>h</i> | E-3K             | 2     | 0,75               | 0,44      | 4            | 0,11               | 0,01                 | +  |          |         |        |       |
| <b>a</b> | <b>wild type</b> | 2     | 4,91               | 18,93     | 1            | 18,93              | 1,00                 |    |          |         |        |       |
| <i>j</i> | AGDMEA           | 3     | 0,00               | 0,00      | 4            | 0,00               | 0,00                 |    |          |         |        |       |
| <i>k</i> | DMEAAA           | 3     | 0,00               | 0,00      | 4            | 0,00               | 0,00                 |    |          |         |        |       |
| <i>u</i> | E-16A            | 3     | 1,50               | 1,77      | 4            | 0,44               | 0,03                 | +  |          |         |        |       |
| <i>v</i> | F-21A            | 3     | 3,26               | 8,35      | 4            | 2,09               | 0,12                 | +  | +        |         |        |       |
| <b>a</b> | <b>wild type</b> | 3     | 4,70               | 17,35     | 1            | 17,35              | 1,00                 |    |          |         |        |       |
| <i>b</i> | E-3A             | 4     | 3,46               | 9,40      | 2            | 4,70               | 0,30                 | +  | +        | +       |        |       |
| <i>e</i> | D-5N             | 4     | 3,85               | 11,64     | 2            | 5,82               | 0,37                 | +  | +        | +       |        |       |
| <i>d</i> | E-3Q             | 4     | 3,89               | 11,88     | 2            | 5,94               | 0,38                 | +  | +        | +       | +      |       |
| <b>a</b> | <b>wild type</b> | 4     | 4,48               | 15,76     | 1            | 15,76              | 1,00                 |    |          |         |        |       |
| <i>t</i> | K-11A            | 5     | 3,58               | 10,07     | 1            | 10,07              | 0,70                 | +  | +        | +       | +      |       |
| <i>p</i> | ΔG-6             | 5     | 4,35               | 14,86     | 1            | 14,86              | 1,03                 | +  | +        | +       | +      | +     |
| <b>a</b> | <b>wild type</b> | 5     | 4,28               | 14,39     | 1            | 14,39              | 1,00                 |    |          |         |        |       |

(of wildtype activity)

## S5. Spectra of AprE cleaved mutants

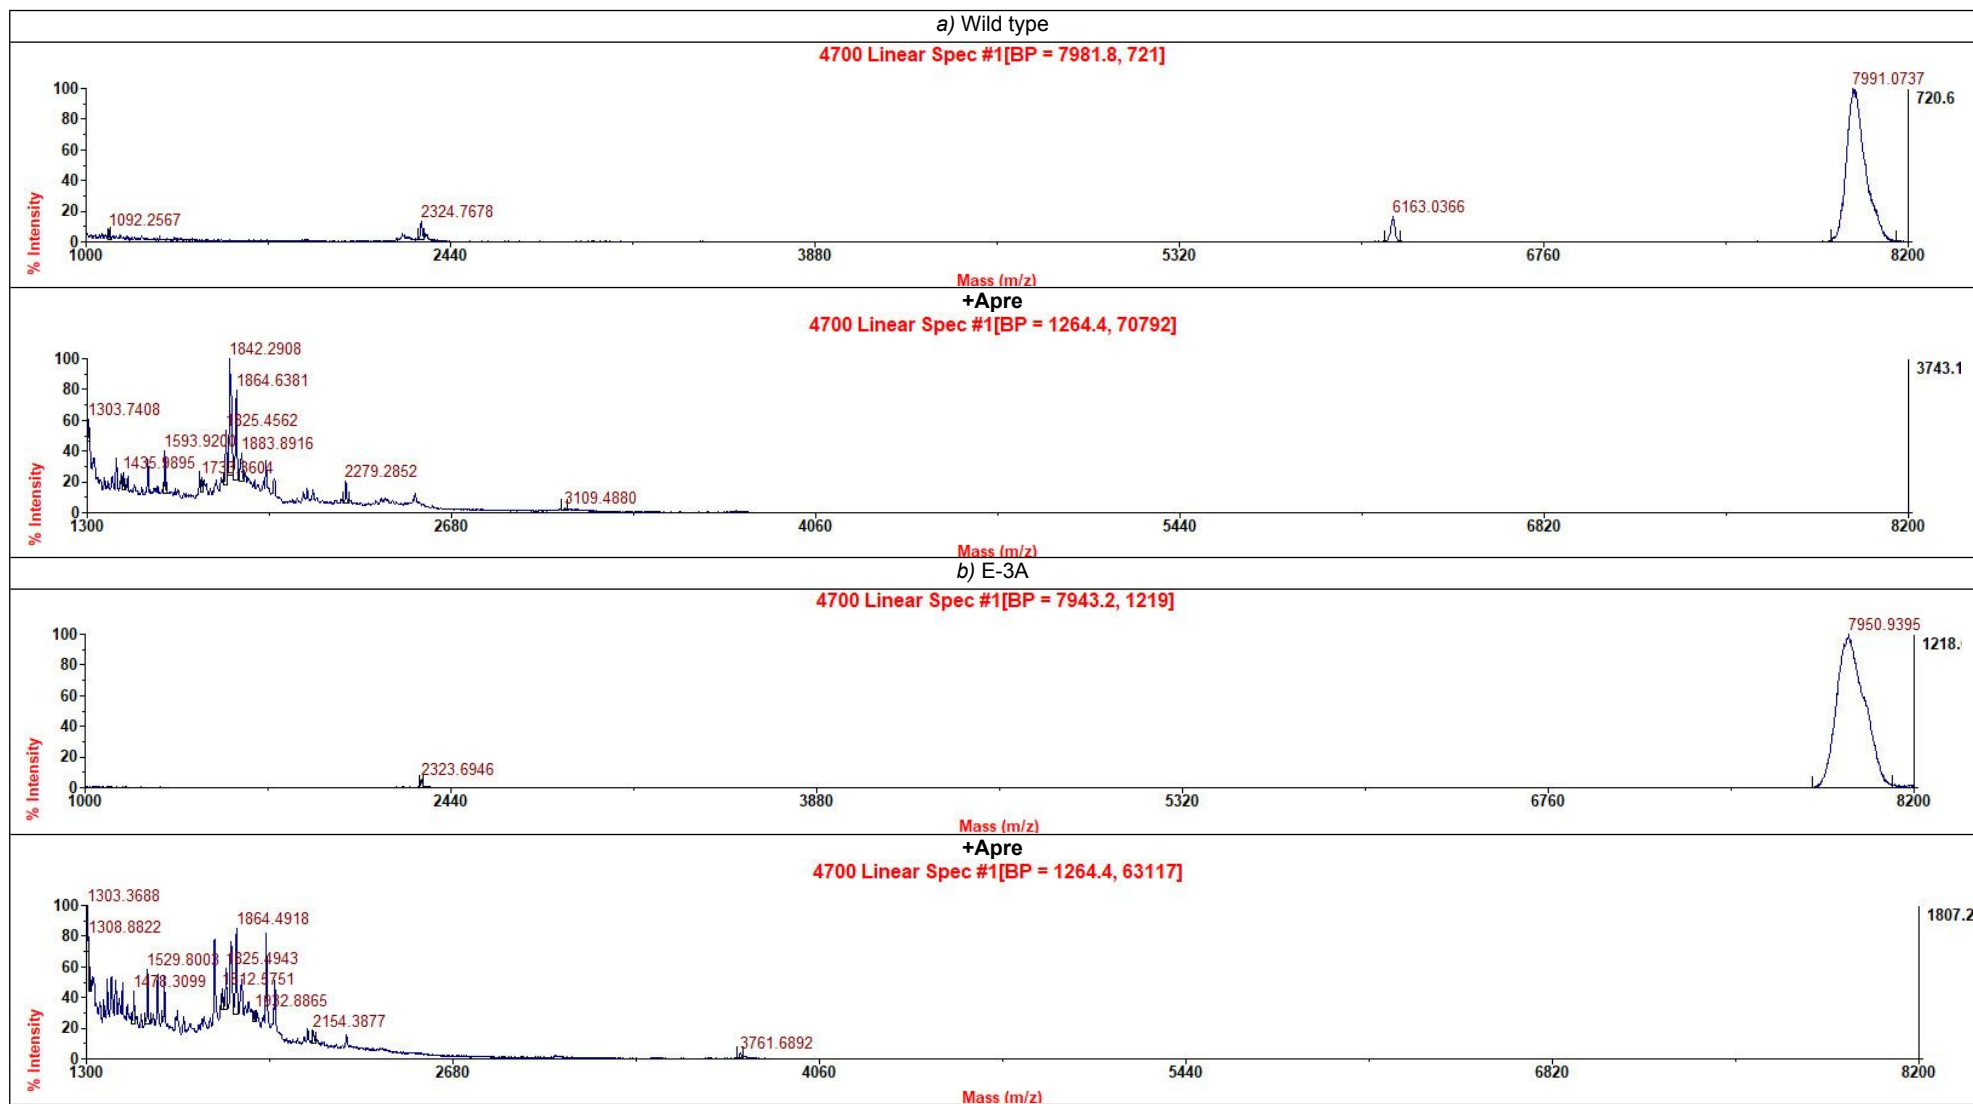

c) D-5A

4700 Linear Spec #1[BP = 7957.3, 940]

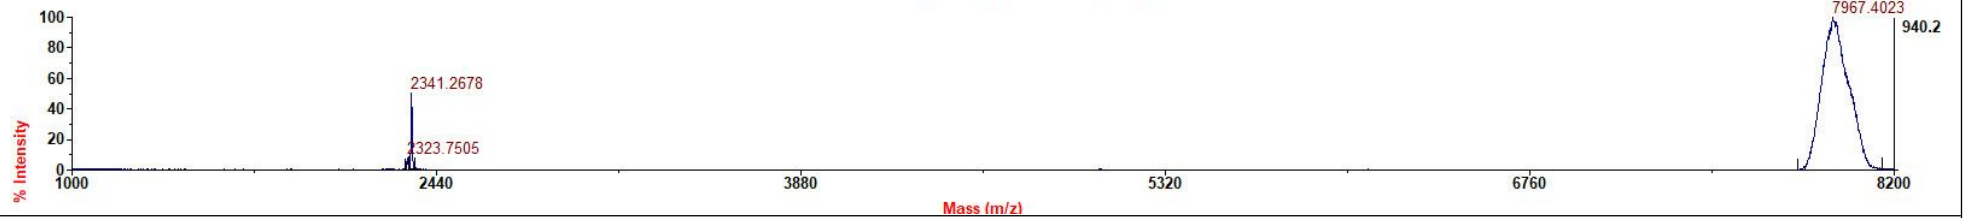

Mass (m/z)

+Apre

4700 Linear Spec #1[BP = 1264.4, 59038]

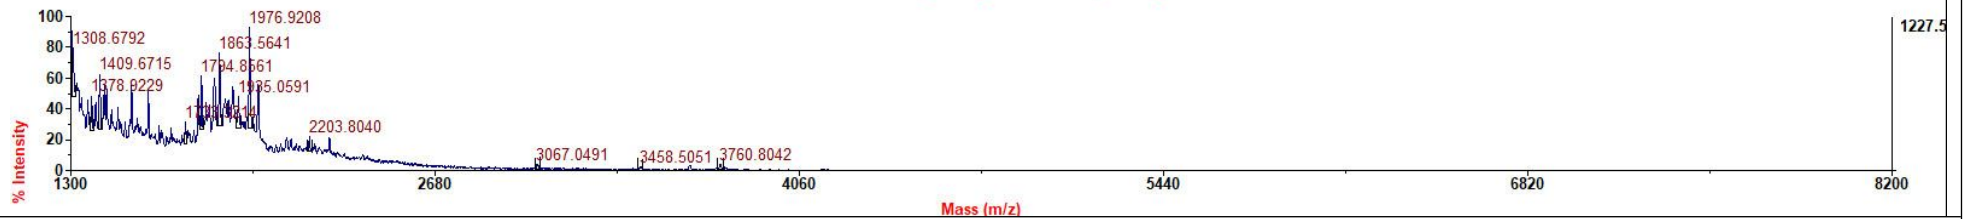

Mass (m/z)

d) E-3Q + MrsM

4700 Linear Spec #1[BP = 8000.5, 1109]

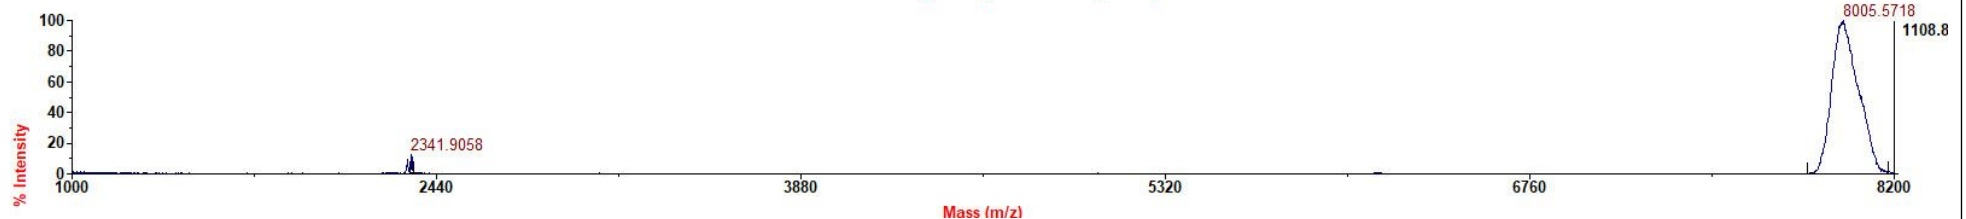

Mass (m/z)

+Apre

4700 Linear Spec #1[BP = 1264.8, 58335]

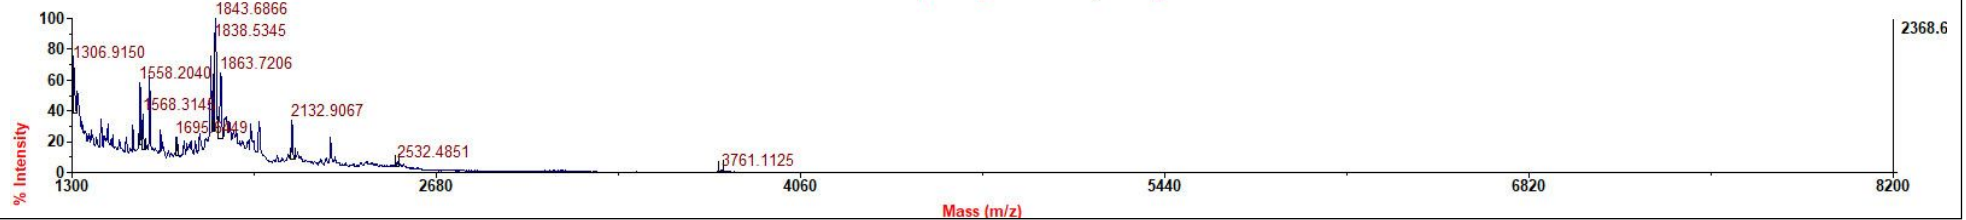

Mass (m/z)

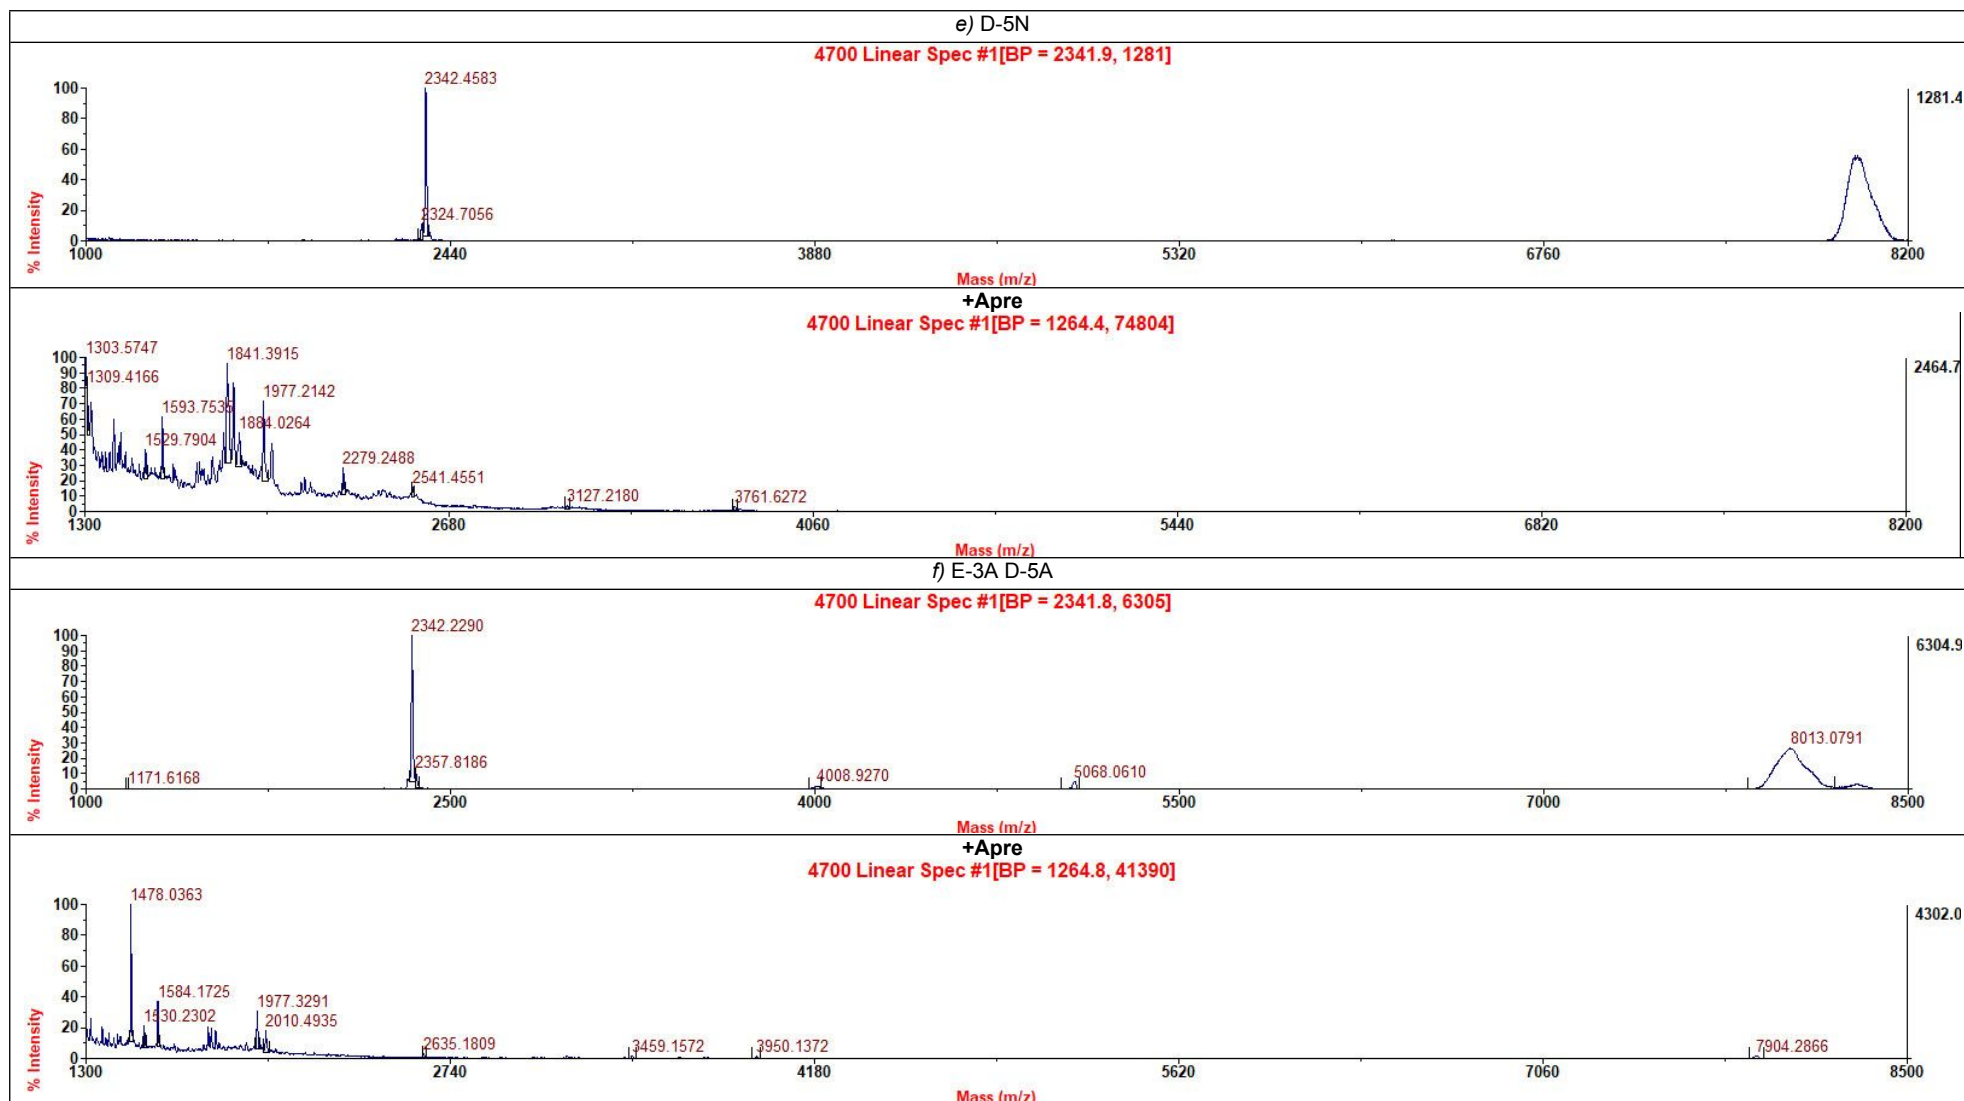

g) E-3Q N-5A

4700 Linear Spec #1[BP = 2341.9, 4502]

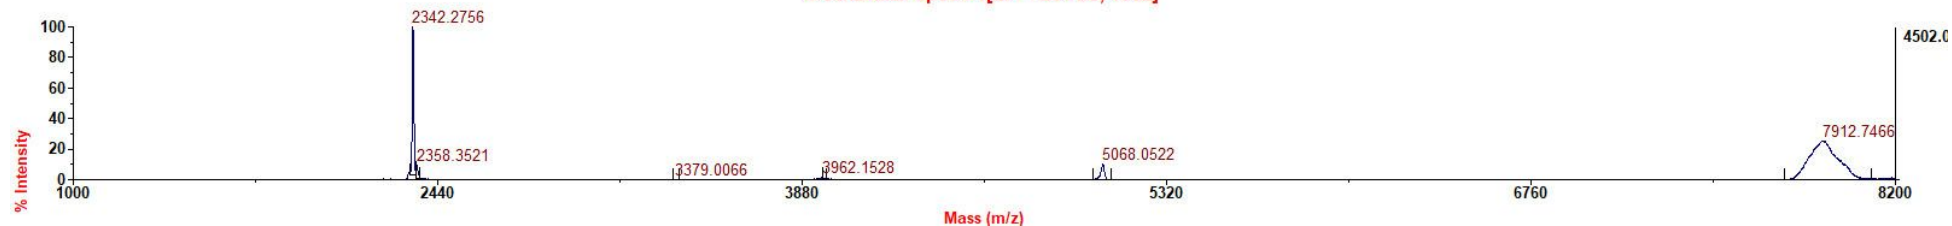

Mass (m/z)

+Apre

4700 Linear Spec #1[BP = 1264.4, 67179]

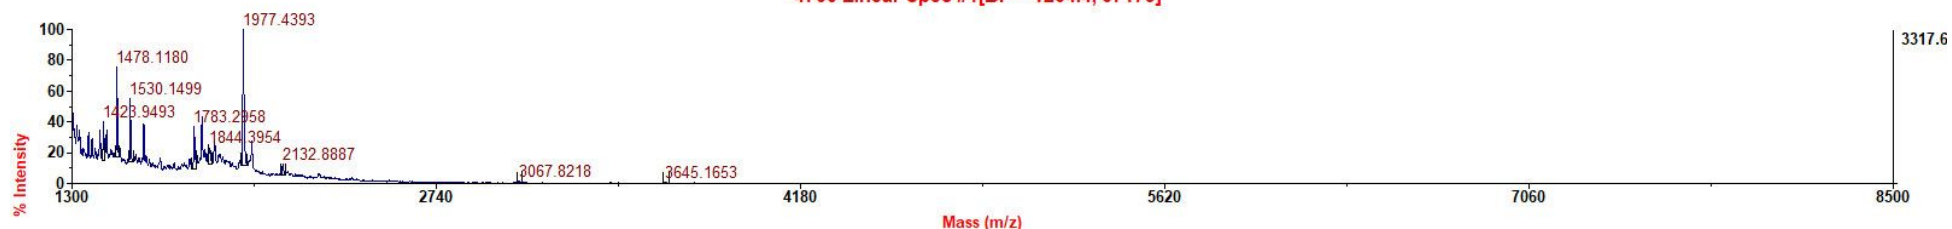

Mass (m/z)

h) E-3K

4700 Linear Spec #1[BP = 8018.5, 1999]

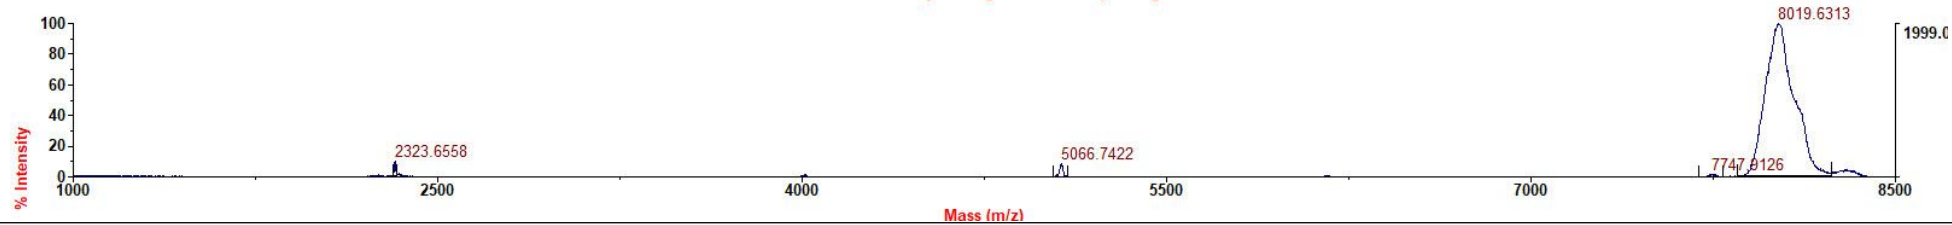

Mass (m/z)

+Apre

4700 Linear Spec #1[BP = 1264.4, 69189]

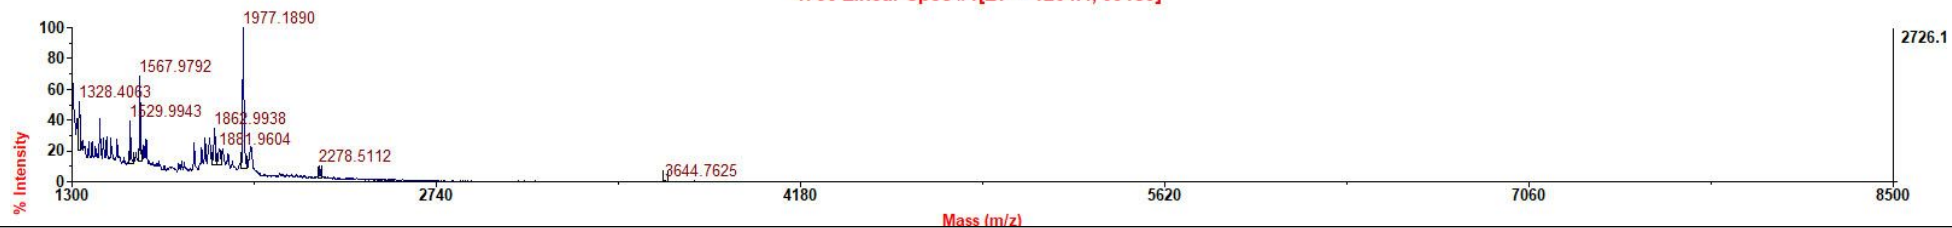

Mass (m/z)

i) D-5K

4700 Linear Spec #1[BP = 8030.9, 1625]

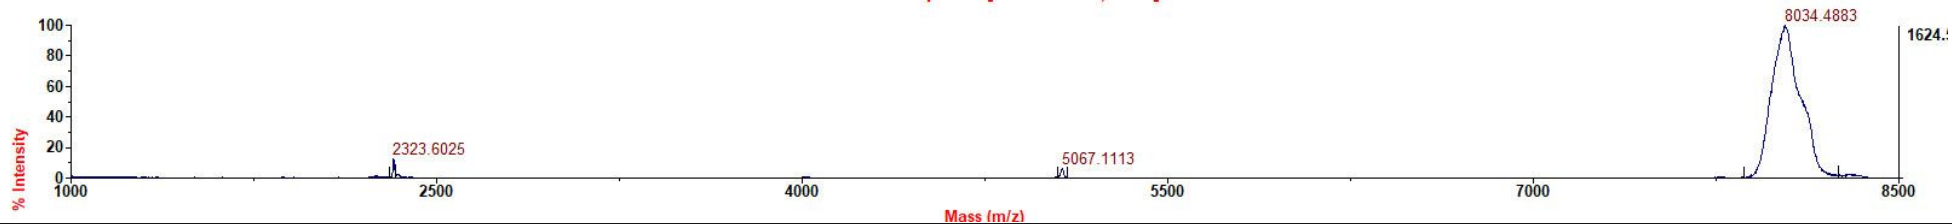

Mass (m/z)

+Apre

4700 Linear Spec #1[BP = 1264.4, 64766]

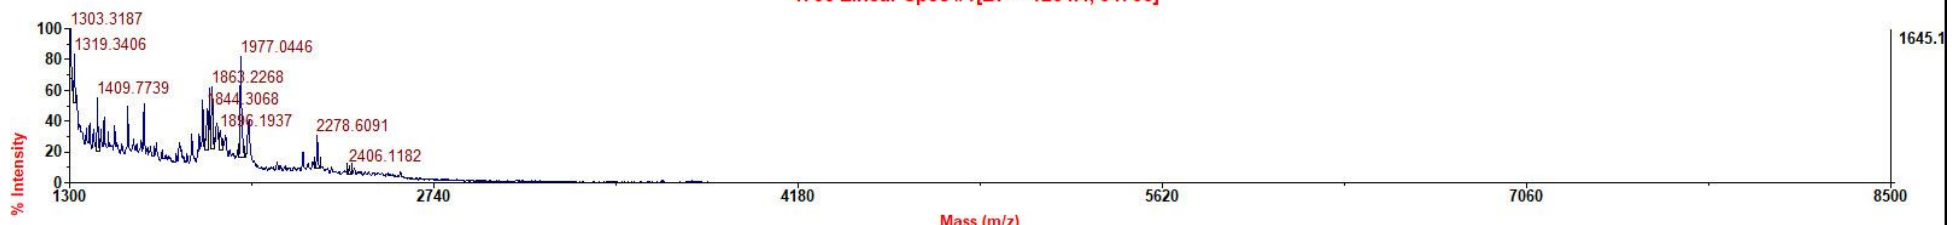

Mass (m/z)

j) AGDMEA

4700 Linear Spec #1[BP = 7984.6, 493]

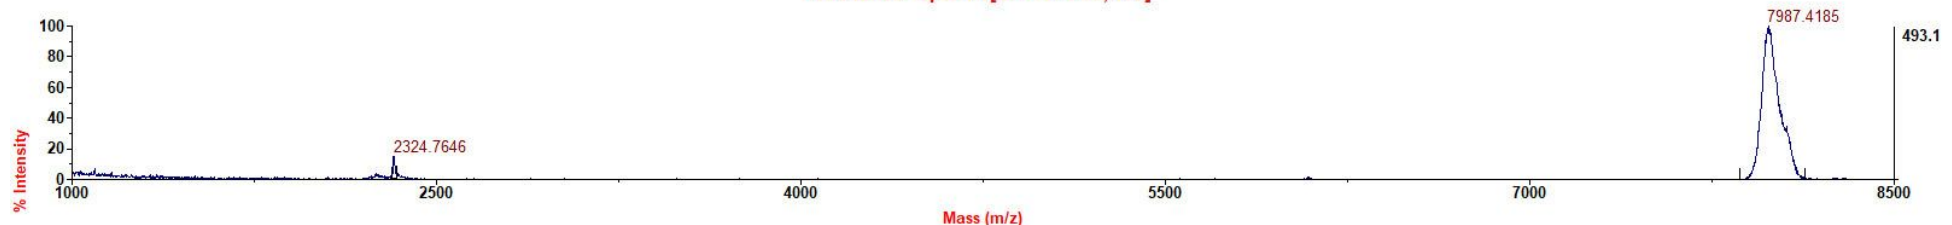

Mass (m/z)

+Apre

4700 Linear Spec #1[BP = 1264.8, 44873]

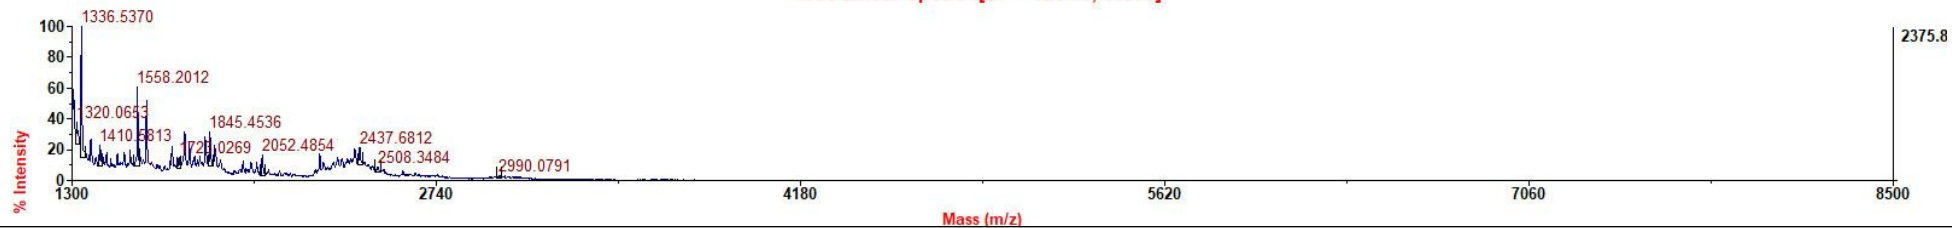

Mass (m/z)



k) DMEAAA

4700 Linear Spec #1[BP = 8035.5, 1354]

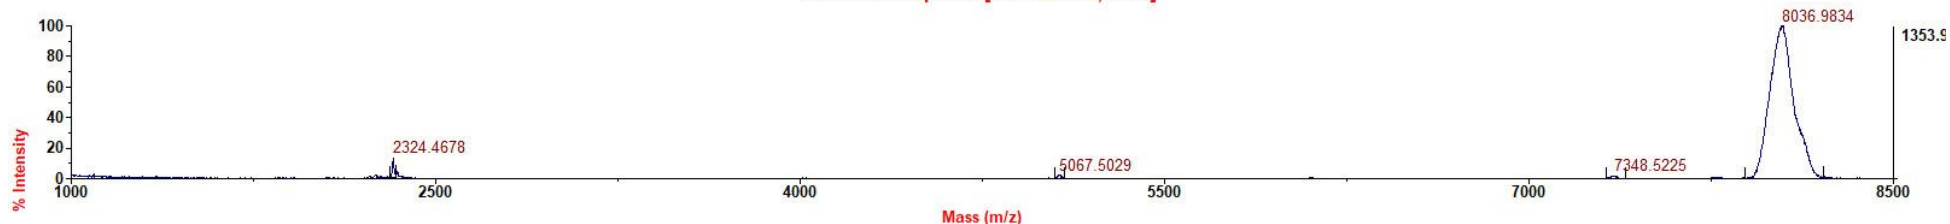

+Apre

4700 Linear Spec #1[BP = 1264.4, 79788]

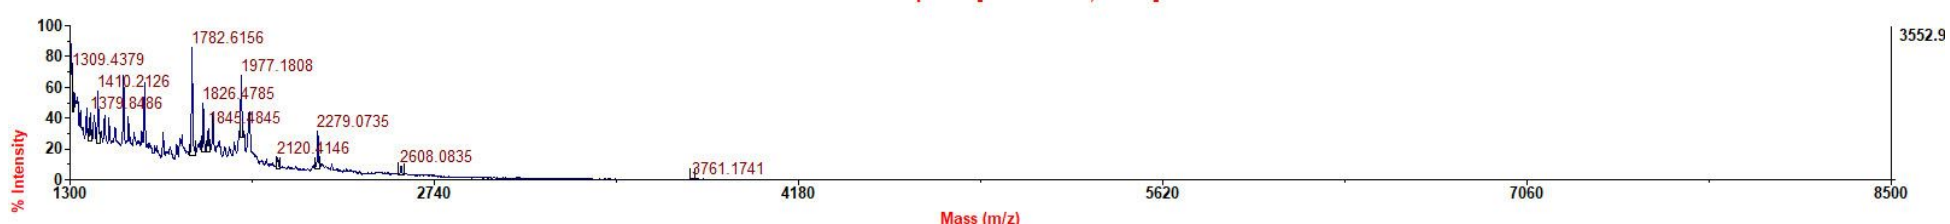

j) ΔDMEA

4700 Linear Spec #1[BP = 7584.3, 1406]

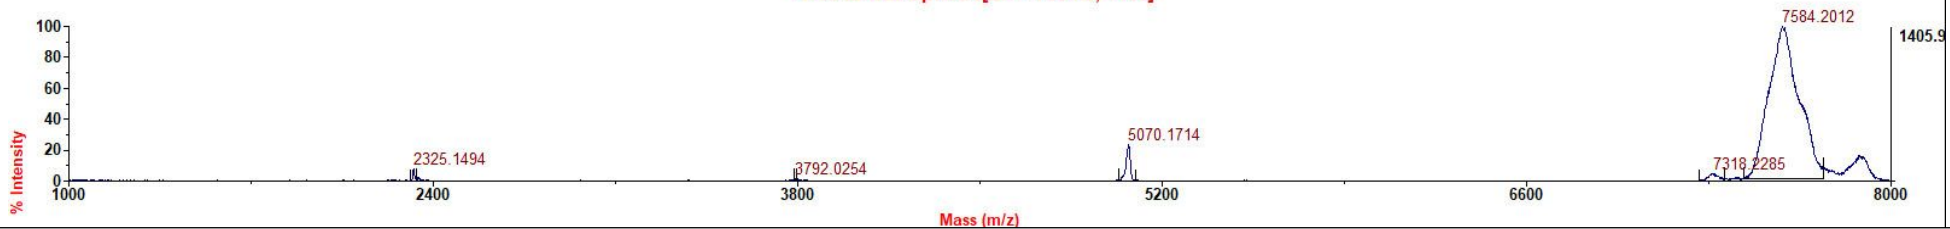

+Apre

4700 Linear Spec #1[BP = 1264.4, 68789]

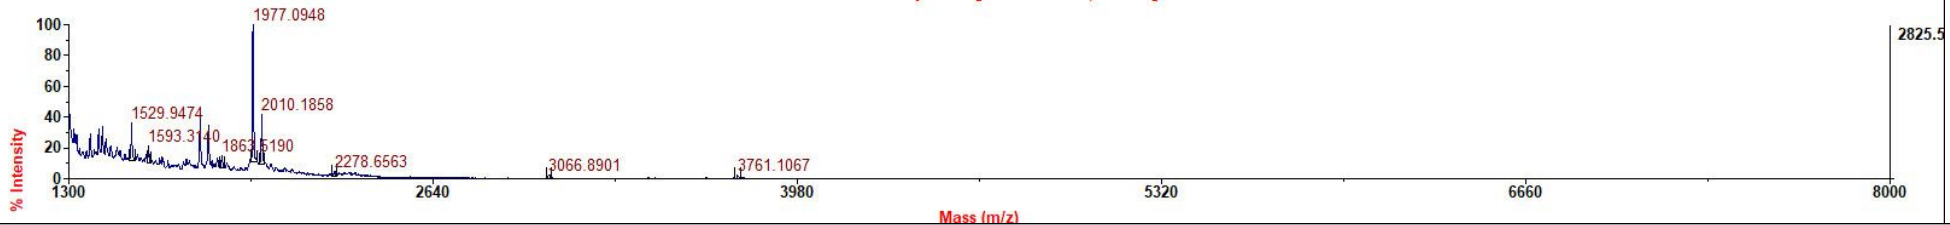

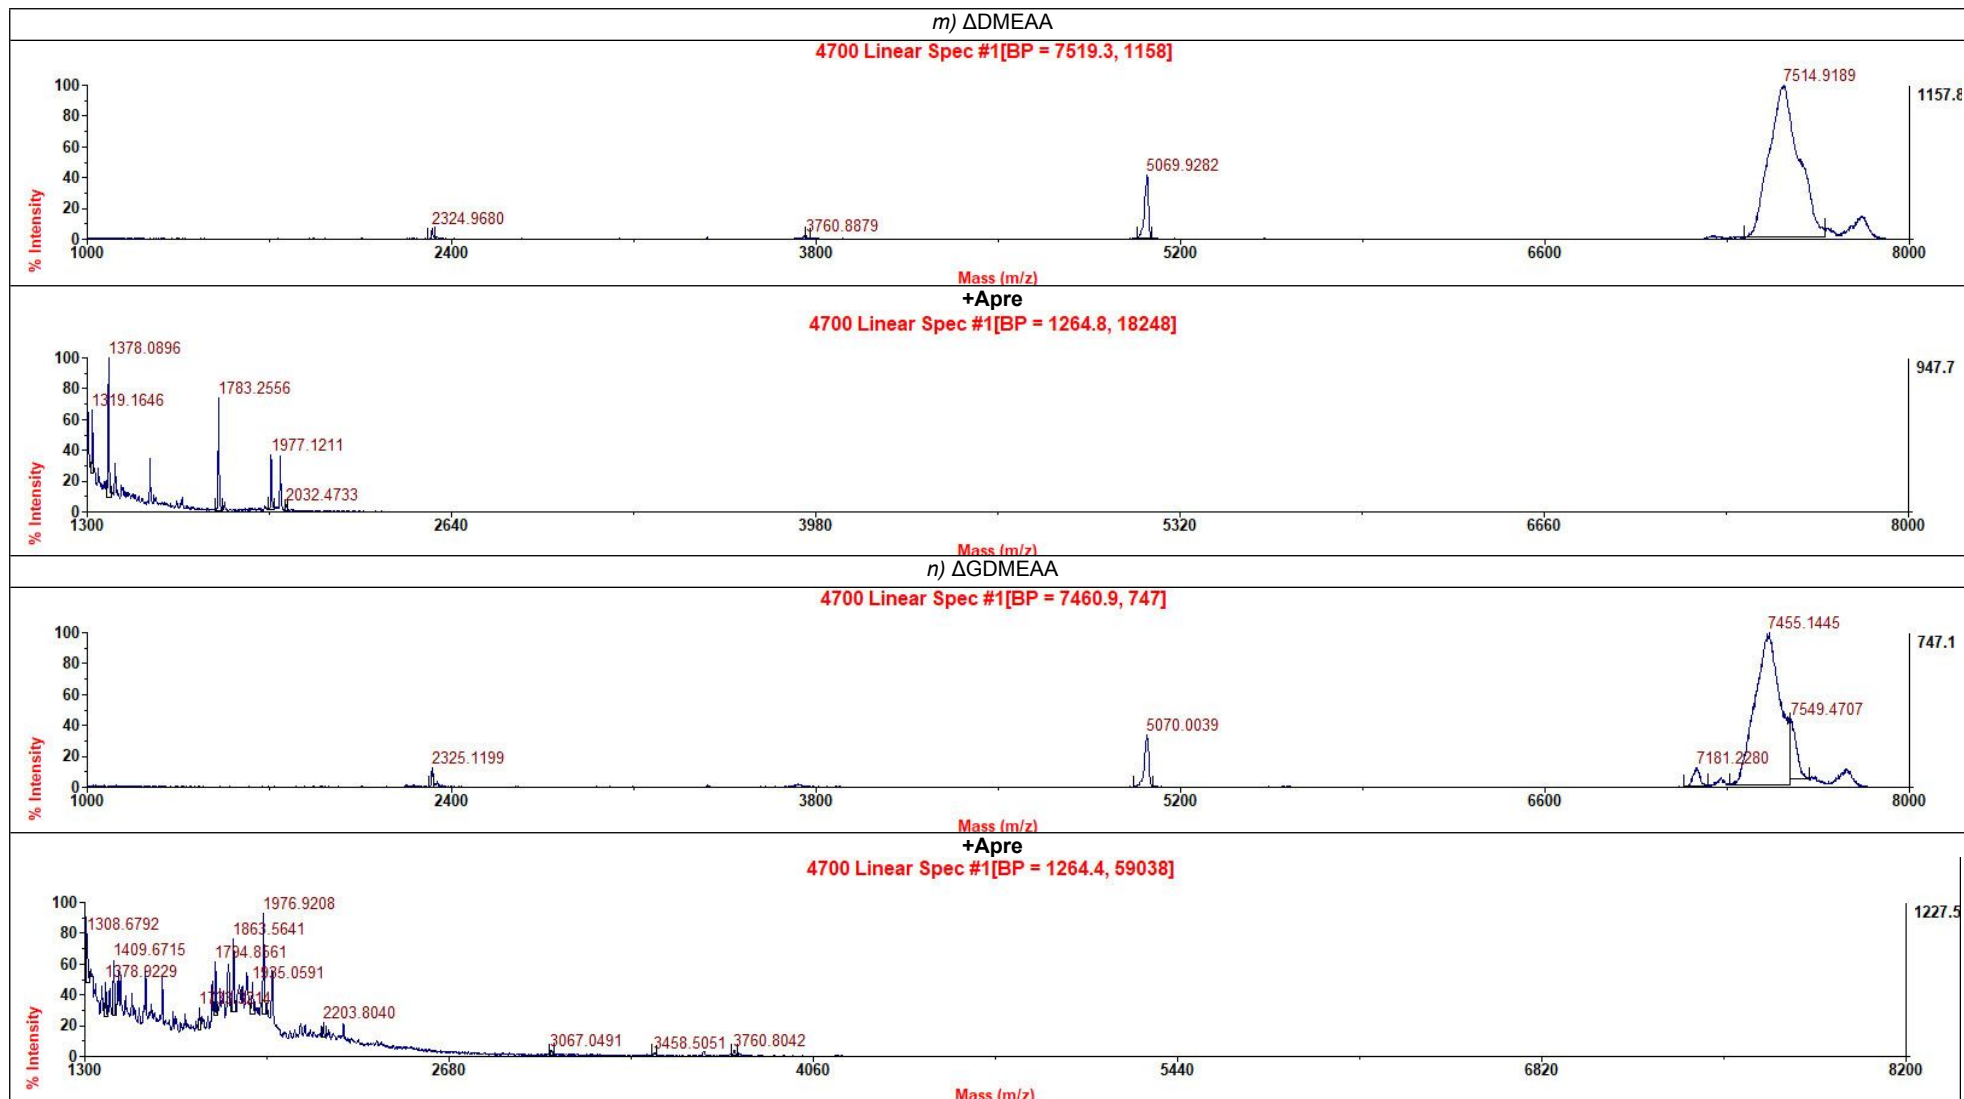

o) ΔA-1

4700 Linear Spec #1[BP = 7934.3, 1480]

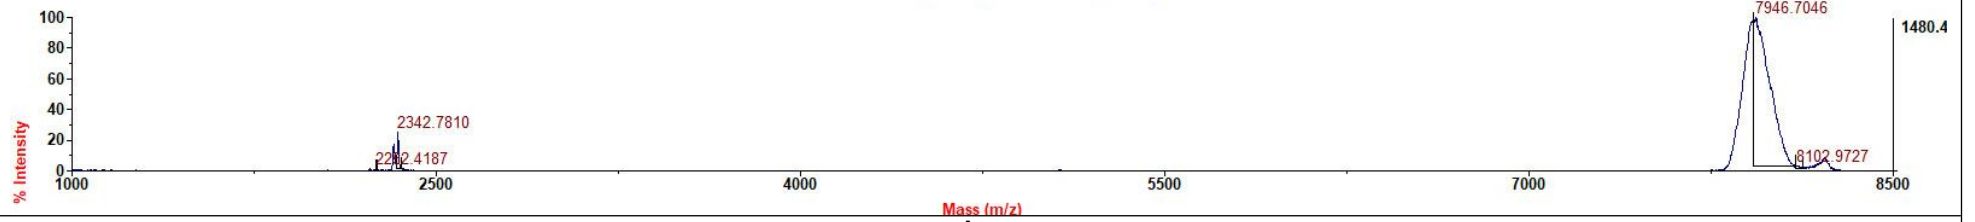

Mass (m/z)

+Apre

4700 Linear Spec #1[BP = 1264.8, 59488]

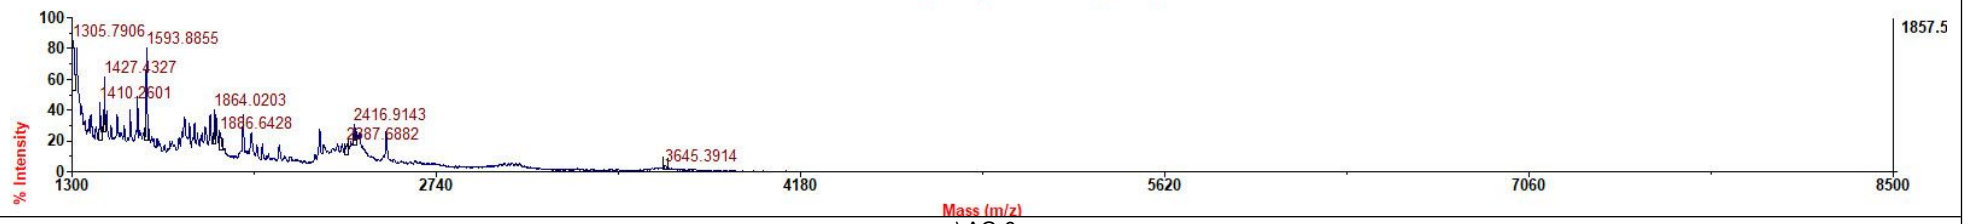

Mass (m/z)

p) ΔG-6

4700 Linear Spec #1[BP = 7923.9, 274]

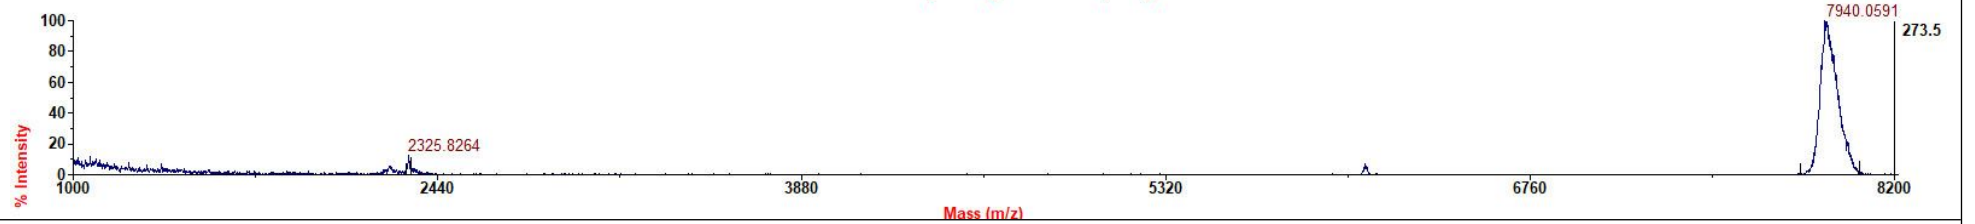

Mass (m/z)

+Apre

4700 Linear Spec #1[BP = 1264.8, 47071]

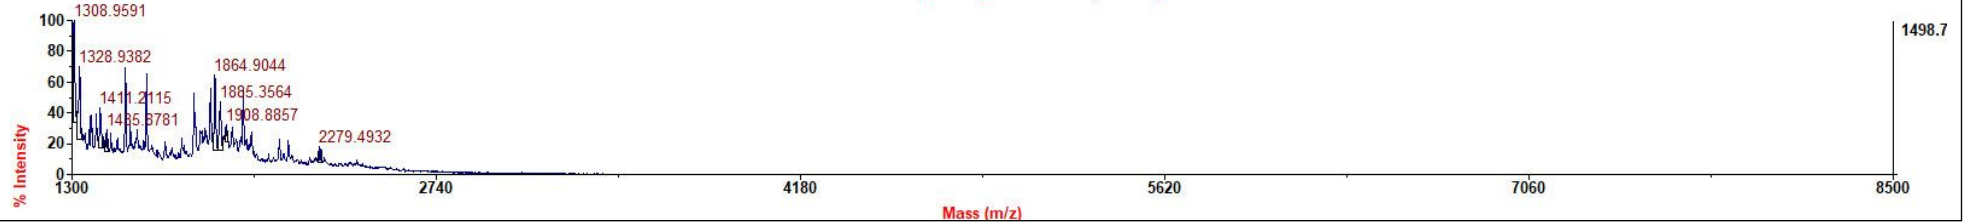

Mass (m/z)

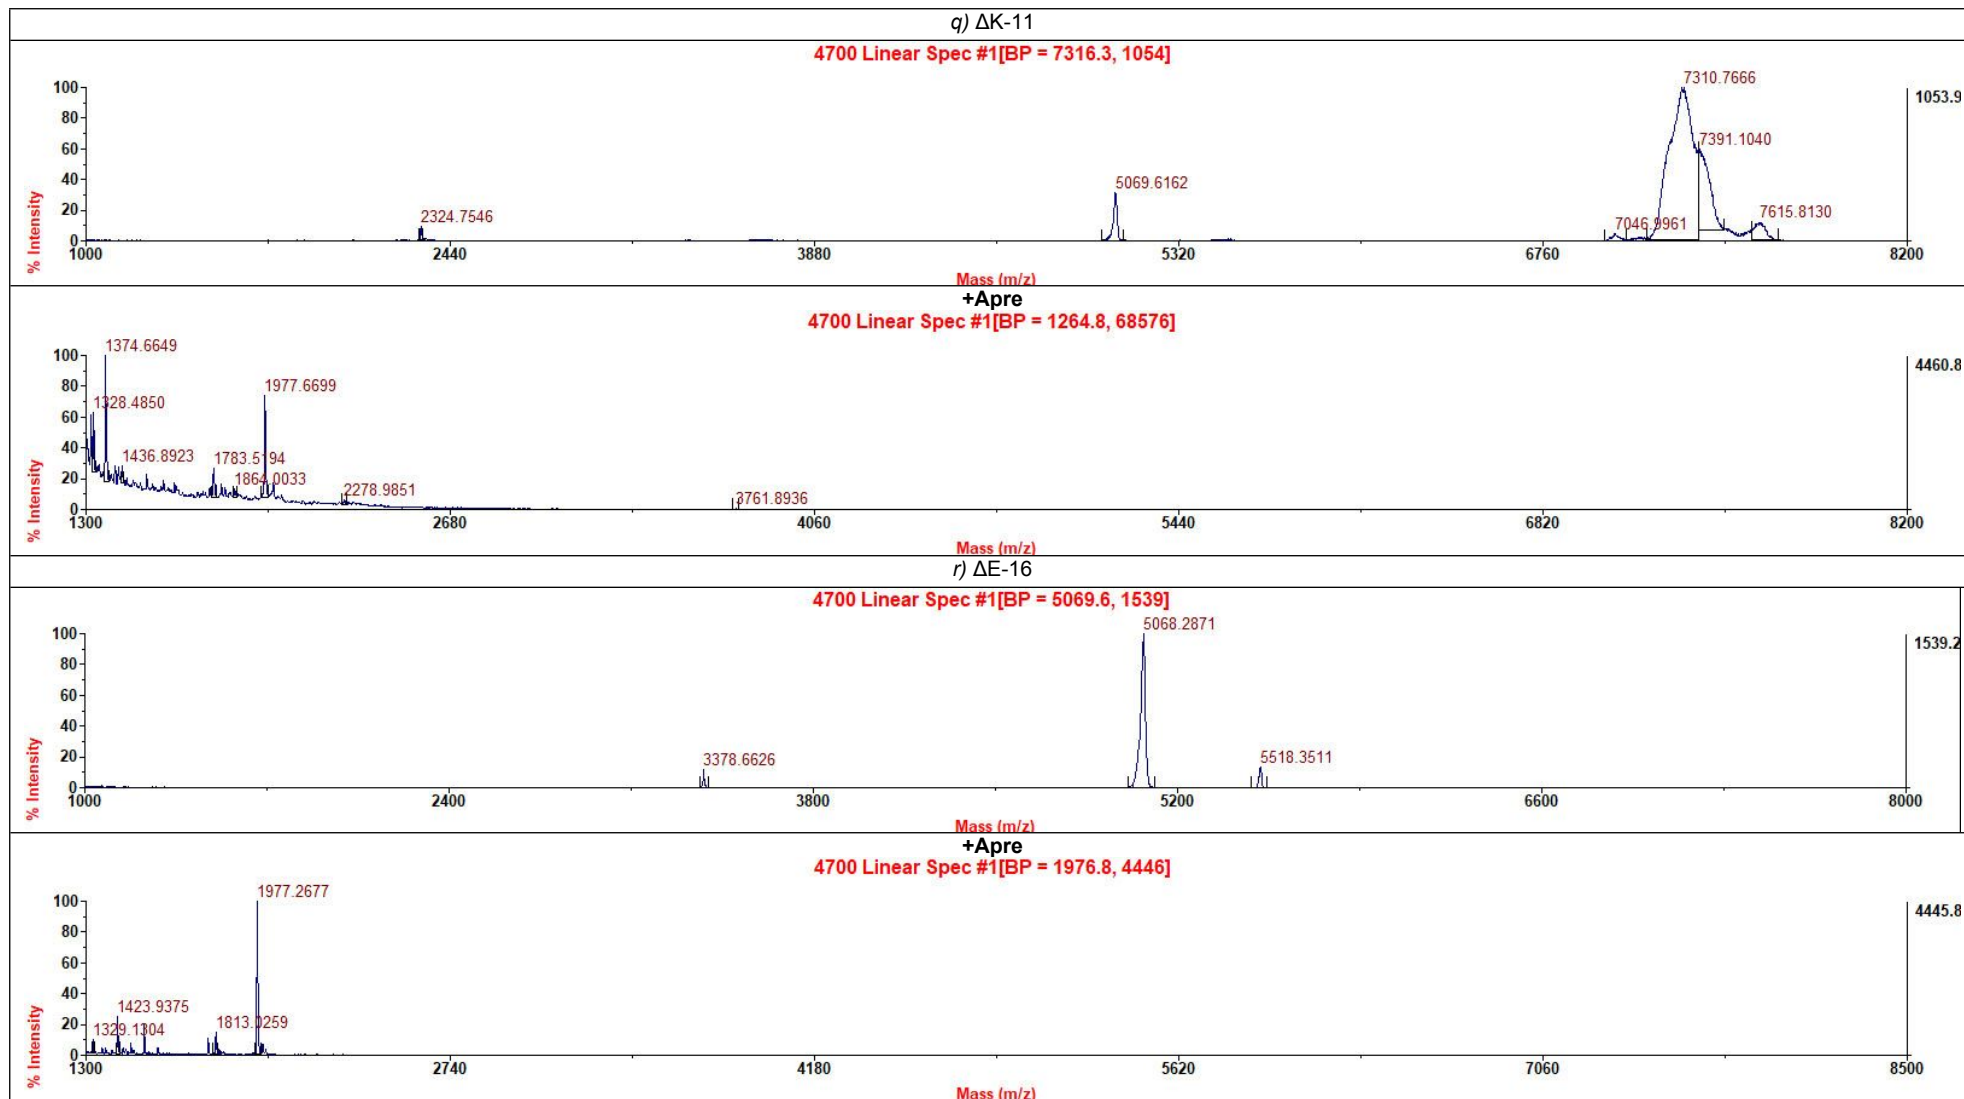

s) ΔF-21

4700 Linear Spec #1[BP = 7909.7, 1453]

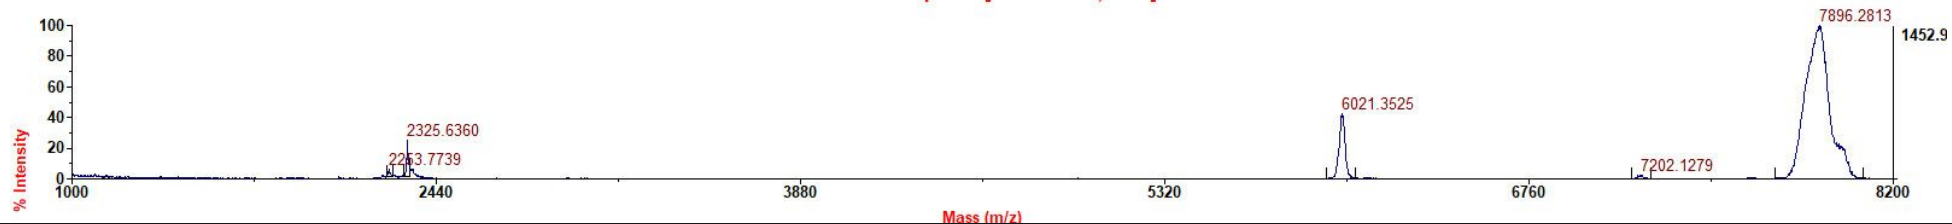

Mass (m/z)

+Apre

4700 Linear Spec #1[BP = 1264.8, 79752]

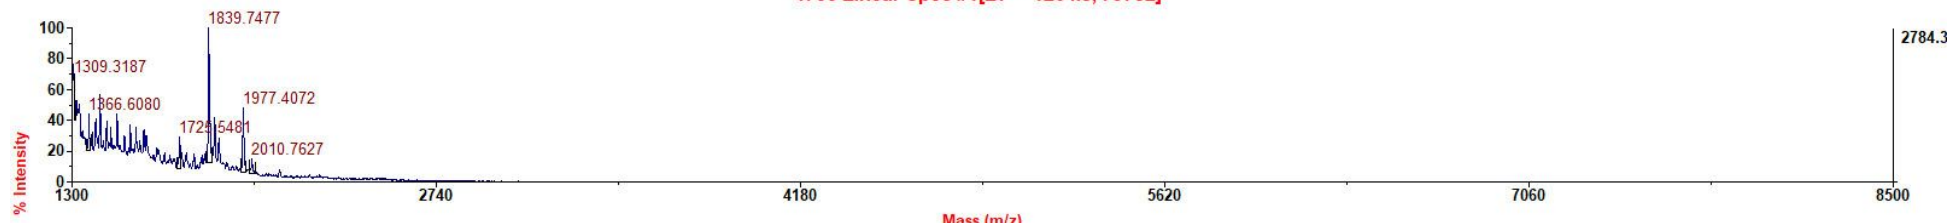

Mass (m/z)

t) K-11A

4700 Linear Spec #1[BP = 2342.4, 5065]

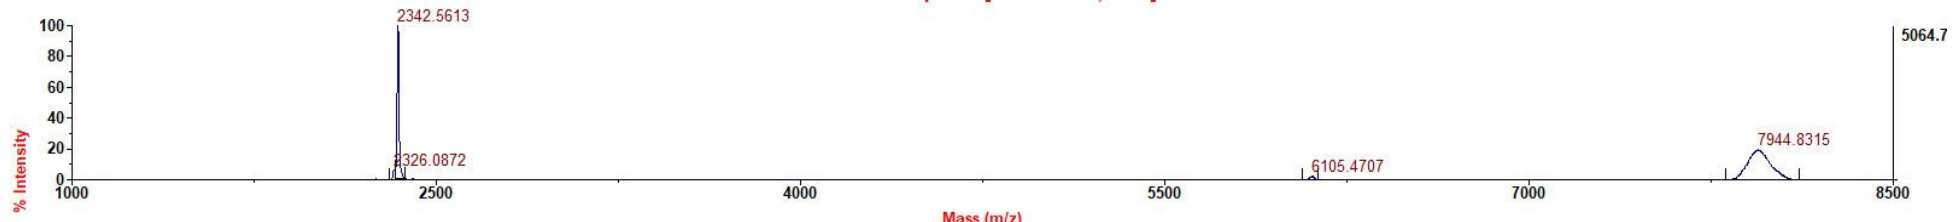

Mass (m/z)

+Apre

4700 Linear Spec #1[BP = 1264.8, 61920]

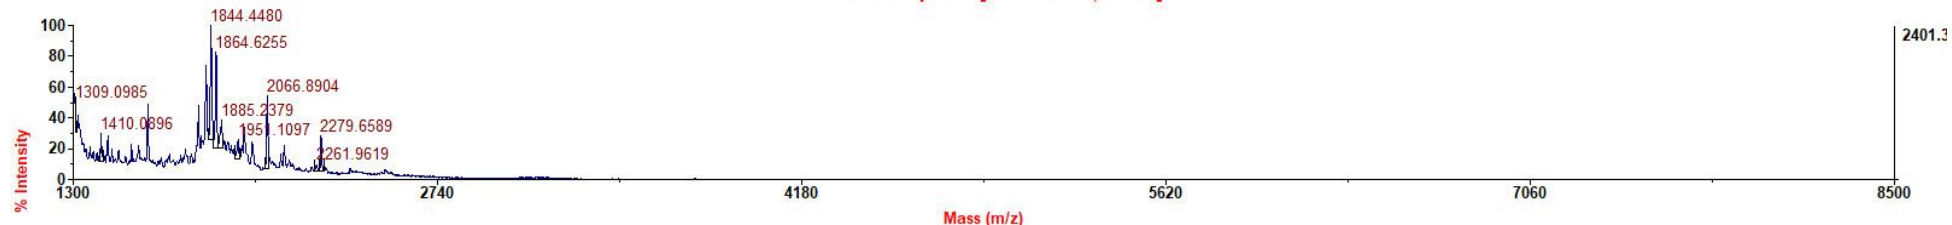

Mass (m/z)

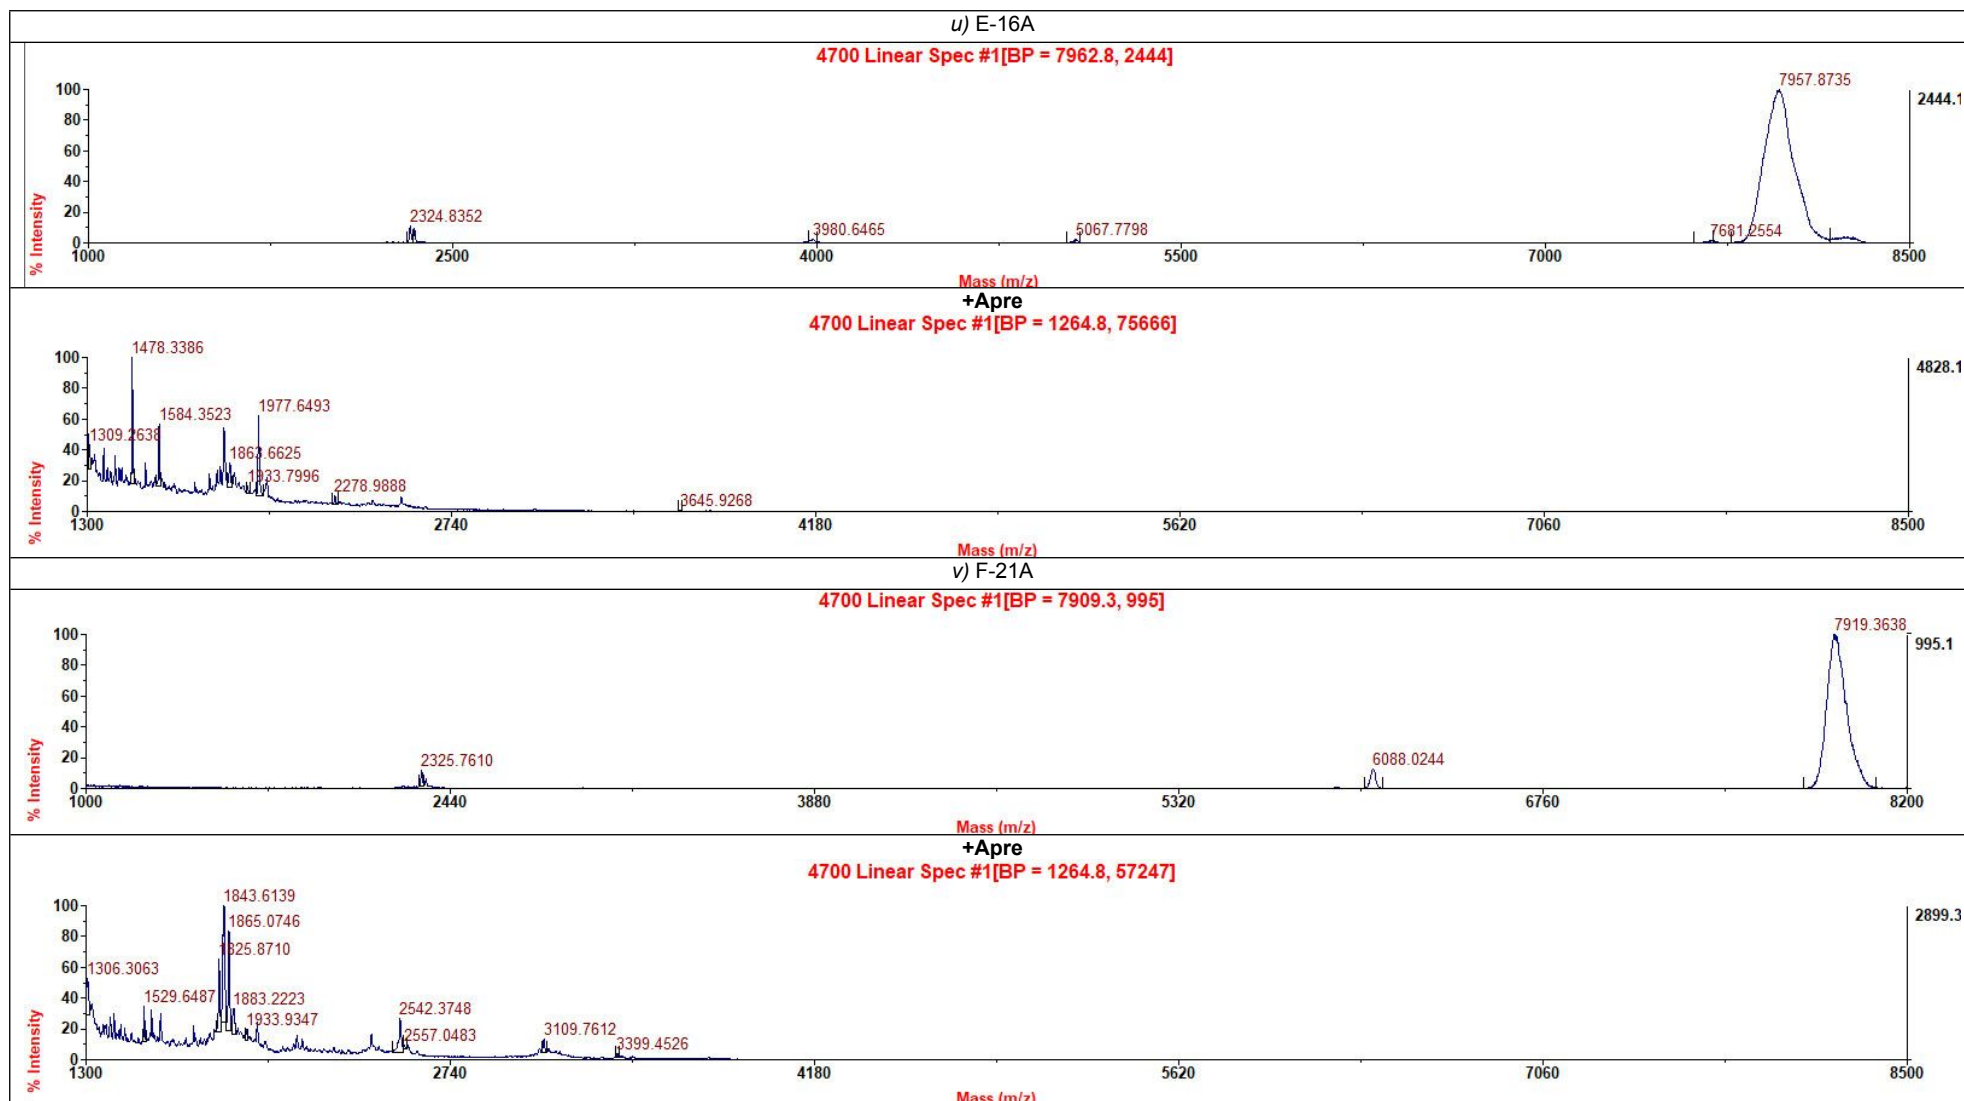

## S6. Comparison of AprE digestion patterns wild type, AGDMEA and ΔA-1

If the lack of activity detected for the AGDMEA and ΔA-1 mutants was caused by AprE no longer being able to cleave the mersacidin leader, peaks larger than the mersacidin mass (1826 Da) should be visible by MALDI-TOF analysis. While the detected peaks that have a higher mass than mersacidin, have a much higher intensity than those in the wild type, these peaks are fragments of the leader peptide not containing mersacidin. Of both tested mutants, the fragments containing mersacidin and up to five amino acids from the leader peptide, should differ one alanine residue in mass. These differences are not detected. In fact, Masses resembling the peak of mersacidin are detected in both the AGDMEA and ΔA-1 mutant's spectra. This shows that AprE can still cleave before the core peptide sequence. The fact that no activity is detected from these cleaved peptides confirms the results from the free cysteine essay, that not all rings have been formed.

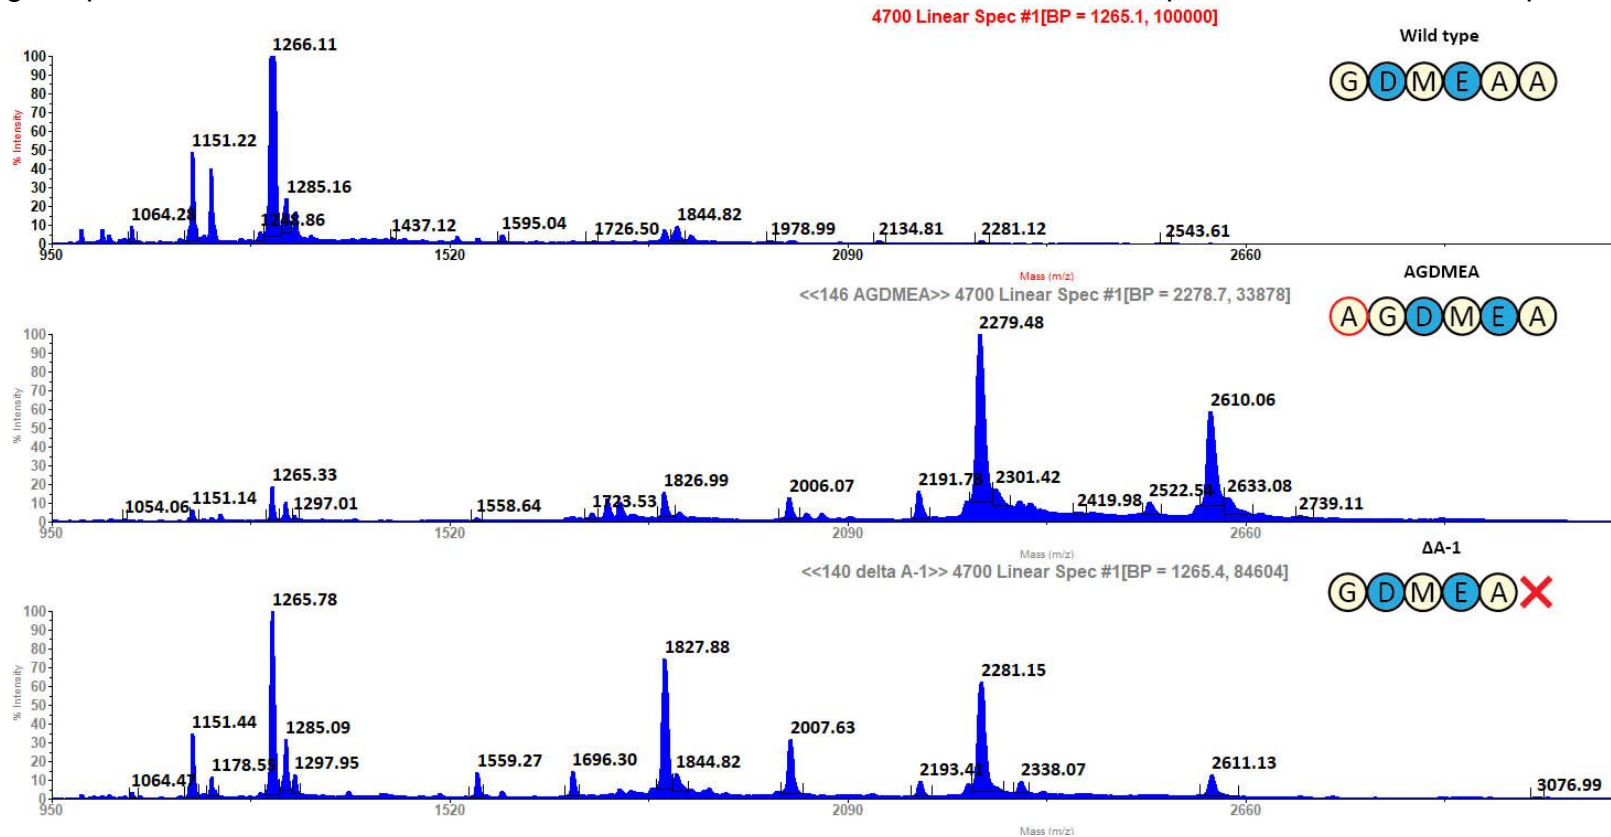

## S7. Table of theoretical average masses

Theoretical average masses of all leader mutants in Dalton

|          | Unmodified                       | -CO <sub>2</sub> | -CO <sub>2</sub> -1<br>H <sub>2</sub> O | -CO <sub>2</sub> -2<br>H <sub>2</sub> O | -CO <sub>2</sub> -3<br>H <sub>2</sub> O | -CO <sub>2</sub> -4<br>H <sub>2</sub> O | -CO <sub>2</sub> -5<br>H <sub>2</sub> O |         |
|----------|----------------------------------|------------------|-----------------------------------------|-----------------------------------------|-----------------------------------------|-----------------------------------------|-----------------------------------------|---------|
| <i>a</i> | <b>Wild type<br/>(His6-MrsA)</b> | 8108,99          | 8062,99                                 | 8044,97                                 | 8026,96                                 | 8008,94                                 | 7990,93                                 | 7972,91 |
| <i>b</i> | pACYC E-3A<br>+ MrsM             | 8050,96          | 8004,95                                 | 7986,94                                 | 7968,92                                 | 7950,91                                 | 7932,89                                 | 7914,88 |
| <i>c</i> | pACYC D-5A<br>+ MrsM             | 8064,98          | 8018,98                                 | 8000,96                                 | 7982,95                                 | 7964,93                                 | 7946,92                                 | 7928,90 |
| <i>d</i> | pACYC E-3Q<br>+ MrsM             | 8108,01          | 8062,00                                 | 8043,99                                 | 8025,97                                 | 8007,96                                 | 7989,94                                 | 7971,93 |
| <i>e</i> | pACYC D-5N<br>+ MrsM             | 8108,01          | 8062,00                                 | 8043,99                                 | 8025,97                                 | 8007,96                                 | 7989,94                                 | 7971,93 |
| <i>f</i> | pACYC E-3A<br>D-5A + MrsM        | 8006,95          | 7960,94                                 | 7942,93                                 | 7924,91                                 | 7906,90                                 | 7888,88                                 | 7870,87 |
| <i>g</i> | pACYC E-3Q<br>N-5A + MrsM        | 8107,02          | 8061,02                                 | 8043,00                                 | 8024,99                                 | 8006,97                                 | 7988,96                                 | 7970,94 |
| <i>h</i> | pACYC E-3K<br>+ MrsM             | 8108,05          | 8062,05                                 | 8044,03                                 | 8026,01                                 | 8008,00                                 | 7989,98                                 | 7971,97 |
| <i>i</i> | pACYC D-5K<br>+ MrsM             | 8122,08          | 8076,07                                 | 8058,06                                 | 8040,04                                 | 8022,03                                 | 8004,01                                 | 7986,00 |
| <i>j</i> | pACYC<br>AGDMEA +<br>MrsM        | 8108,99          | 8062,99                                 | 8044,97                                 | 8026,96                                 | 8008,94                                 | 7990,93                                 | 7972,91 |
| <i>k</i> | pACYC<br>DMEAAA +<br>MrsM        | 8123,02          | 8077,01                                 | 8059,00                                 | 8040,98                                 | 8022,97                                 | 8004,95                                 | 7986,94 |
| <i>l</i> | pACYC<br>ΔDMEA +<br>MrsM         | 7662,52          | 7616,51                                 | 7598,50                                 | 7580,48                                 | 7562,46                                 | 7544,45                                 | 7526,43 |
| <i>m</i> | pACYC<br>ΔDMEAA +<br>MrsM        | 7591,44          | 7545,43                                 | 7527,42                                 | 7509,40                                 | 7491,39                                 | 7473,37                                 | 7455,36 |
| <i>n</i> | pACYC<br>ΔGDMEAA +<br>MrsM       | 7534,39          | 7488,38                                 | 7470,37                                 | 7452,35                                 | 7434,33                                 | 7416,32                                 | 7398,30 |
| <i>o</i> | pACYC ΔA-1<br>+ MrsM             | 8037,92          | 7991,91                                 | 7973,89                                 | 7955,88                                 | 7937,86                                 | 7919,85                                 | 7901,83 |
| <i>p</i> | pACYC ΔG-6<br>+ MrsM             | 8051,94          | 8005,94                                 | 7987,92                                 | 7969,90                                 | 7951,89                                 | 7933,87                                 | 7915,86 |
| <i>q</i> | pACYC ΔK-11<br>+ MrsM            | 7980,82          | 7934,81                                 | 7916,80                                 | 7898,78                                 | 7880,77                                 | 7862,75                                 | 7844,74 |
| <i>r</i> | pACYC ΔE-16<br>+ MrsM            | 7979,88          | 7933,87                                 | 7915,86                                 | 7897,84                                 | 7879,83                                 | 7861,81                                 | 7843,80 |
| <i>s</i> | pACYC ΔF-21<br>+ MrsM            | 7961,82          | 7915,81                                 | 7897,80                                 | 7879,78                                 | 7861,77                                 | 7843,75                                 | 7825,74 |
| <i>t</i> | pACYC K-11A<br>+ MrsM            | 8051,90          | 8005,89                                 | 7987,88                                 | 7969,86                                 | 7951,85                                 | 7933,83                                 | 7915,82 |
| <i>u</i> | pACYC E-16A<br>+ MrsM            | 8050,96          | 8004,95                                 | 7986,94                                 | 7968,92                                 | 7950,91                                 | 7932,89                                 | 7914,88 |
| <i>v</i> | pACYC F-21A<br>+ MrsM            | 8032,90          | 7986,89                                 | 7968,88                                 | 7950,86                                 | 7932,85                                 | 7914,83                                 | 7896,82 |
|          | Mersacidin leader<br>+GDMEAA     | 6164,71          |                                         |                                         |                                         |                                         |                                         |         |
|          | Mersacidin leader<br>-GDMEAA     | 5590,10          |                                         |                                         |                                         |                                         |                                         |         |



## S8. MrsT150-His cleavage analysis

The peptides, as verified by LC-MS mass analysis, were incubated with MrsT150-His, and analyzed by MALDI-TOF analysis. The large size prevents accurate depiction of the masses of individual dehydration states, but still gives a precise centroid mass. The mercacidin leader -GDMEAA theoretical average mass is 5590,10 Da (with the exception of variants where residues upstream of GDMEAA were mutated), which can be detected if MrsT150-His can process the leader mutant.

| a) Wild type |  |                             |
|--------------|--|-----------------------------|
| No MrsT      |  | Is processed by MrsT150-His |
| +MrsT150-His |  |                             |
| b) E-3A      |  |                             |
| No MrsT      |  | Is processed by MrsT150-His |
| +MrsT150-His |  |                             |
| c) D-5A      |  |                             |
| No MrsT      |  | Is processed by MrsT150-His |
| +MrsT150-His |  |                             |

d) D-5N

|                     |                                                                                                                                                                        |                                    |
|---------------------|------------------------------------------------------------------------------------------------------------------------------------------------------------------------|------------------------------------|
| <p>No MrsT</p>      | <p>4700 Linear Spec #1[BP = 2341.9, 1281]</p> 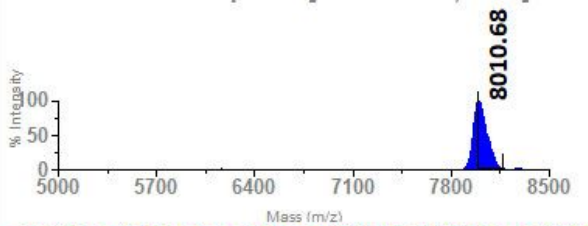 <p>Mass (m/z)</p>                      | <p>Is processed by MrsT150-His</p> |
| <p>+MrsT150-His</p> | <p>&lt;&lt;113&gt;&gt; 4700 Linear Spec #1[BP = 5597.1, 16993]</p>  <p>Mass (m/z)</p> |                                    |

e) E-3Q

|                     |                                                                                                                                                                          |                                    |
|---------------------|--------------------------------------------------------------------------------------------------------------------------------------------------------------------------|------------------------------------|
| <p>No MrsT</p>      | <p>4700 Linear Spec #1[BP = 8000.5, 1109]</p> 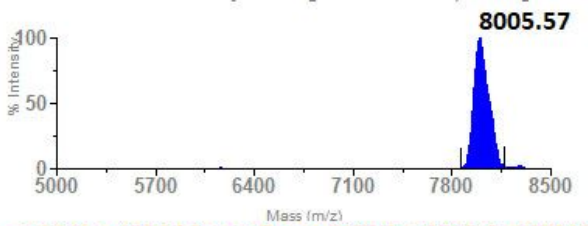 <p>Mass (m/z)</p>                       | <p>Is processed by MrsT150-His</p> |
| <p>+MrsT150-His</p> | <p>&lt;&lt;111&gt;&gt; 4700 Linear Spec #1[BP = 5597.2, 17036]</p>  <p>Mass (m/z)</p> |                                    |

f) E-3A D-5A

|                     |                                                                                                                                                                          |                                    |
|---------------------|--------------------------------------------------------------------------------------------------------------------------------------------------------------------------|------------------------------------|
| <p>No MrsT</p>      | <p>4700 Linear Spec #1[BP = 2341.9, 4502]</p> 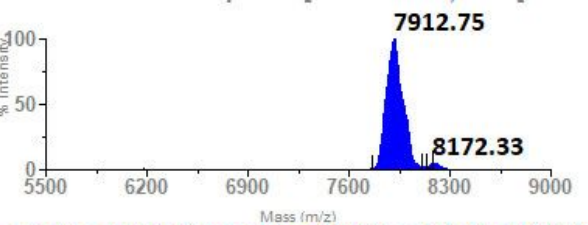 <p>Mass (m/z)</p>                      | <p>Is processed by MrsT150-His</p> |
| <p>+MrsT150-His</p> | <p>&lt;&lt;132&gt;&gt; 4700 Linear Spec #1[BP = 5596.2, 15977]</p>  <p>Mass (m/z)</p> |                                    |

g) E-3Q D-5N

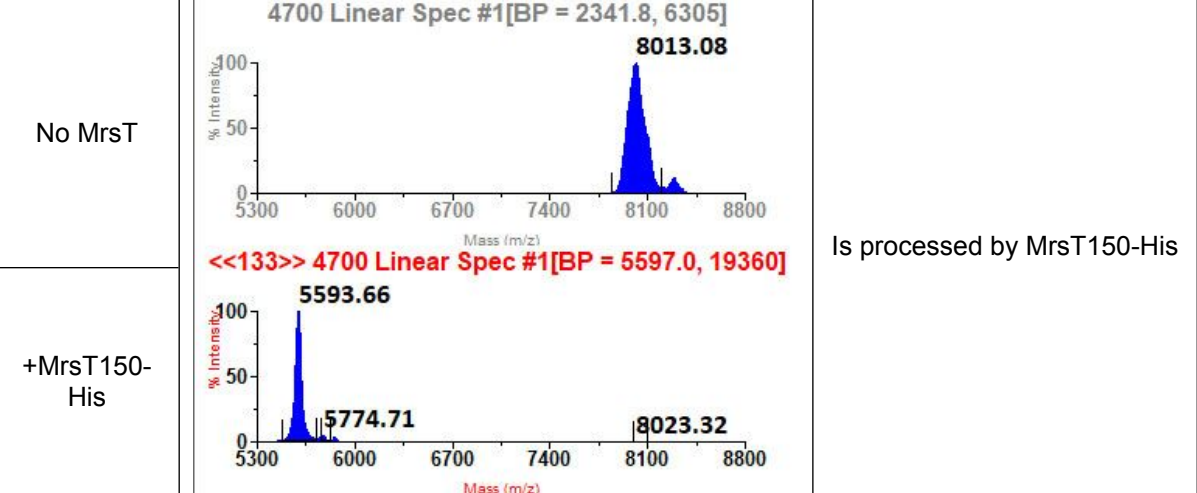

h) E-3K

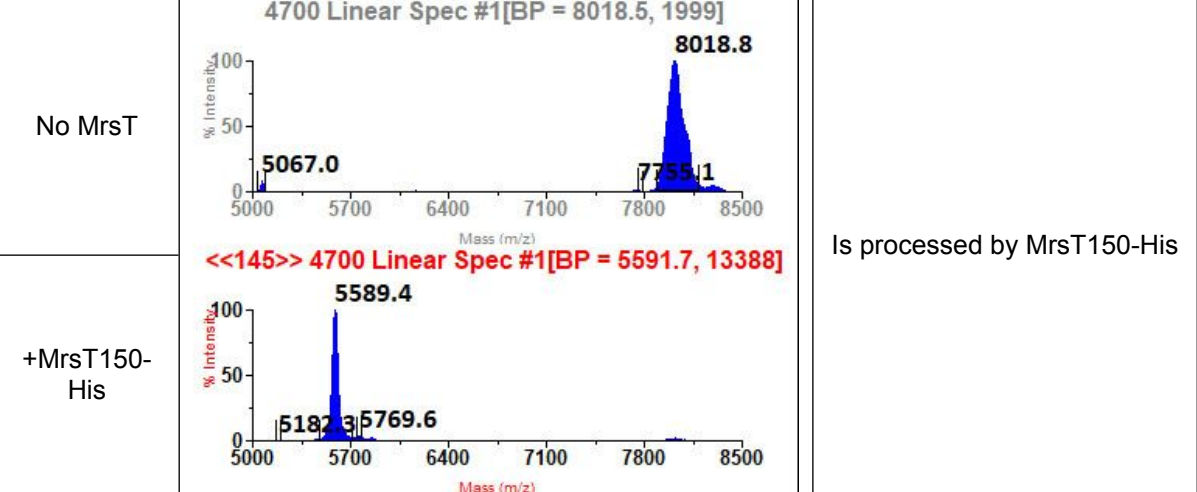

i) D-5K

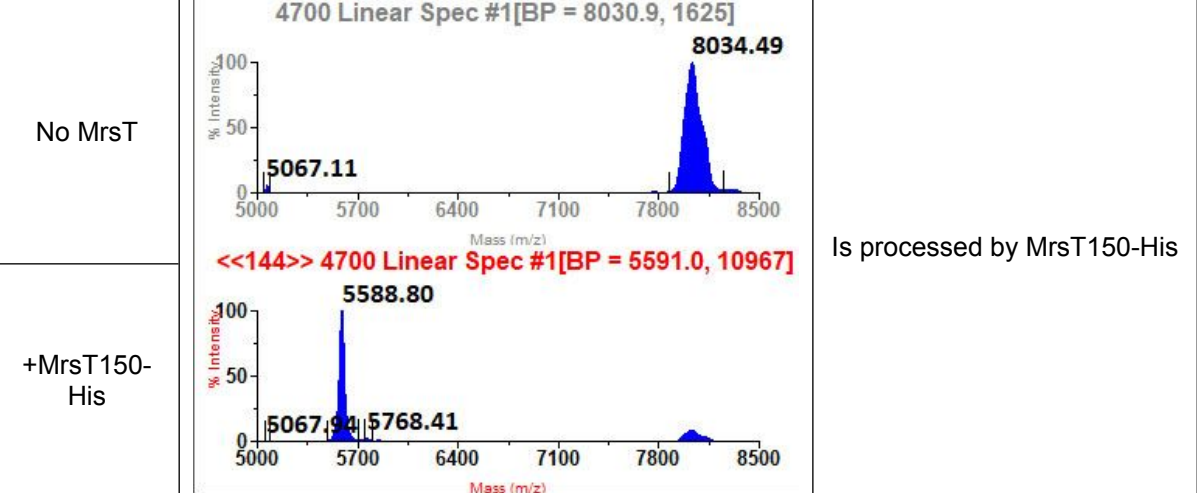

j) AGDMEA

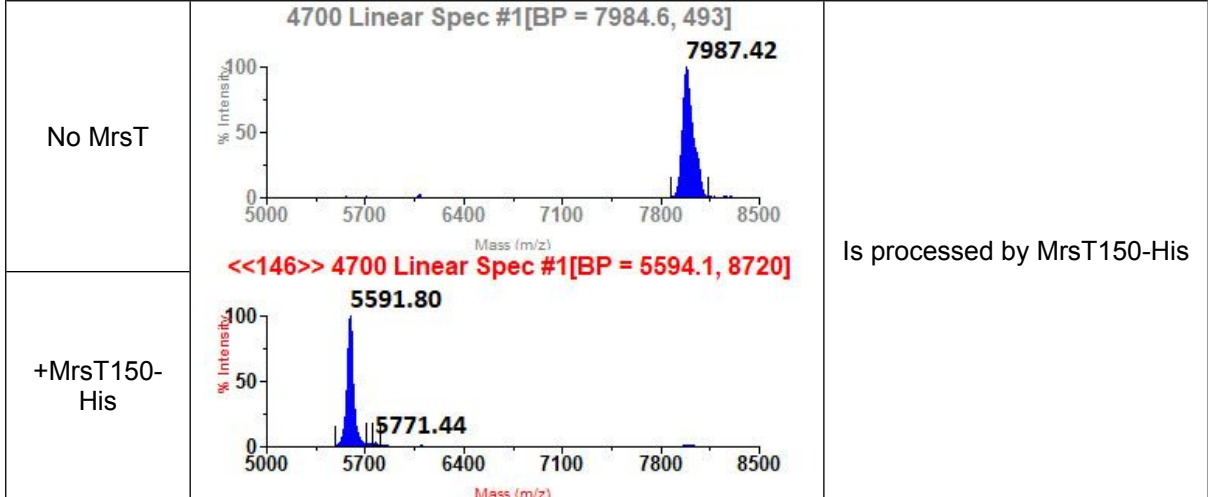

k) DMEAAA

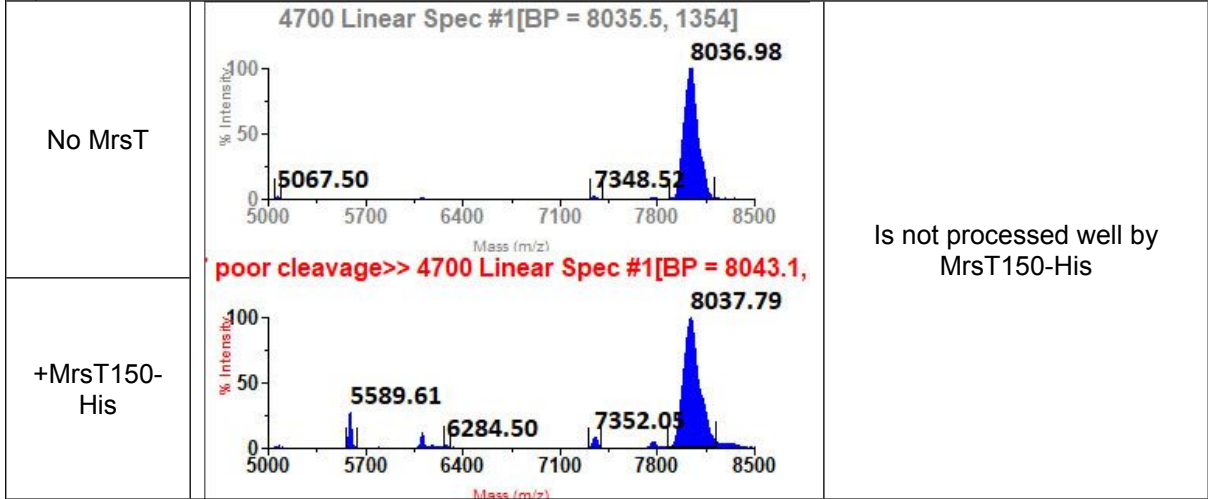

l) ΔDMEA

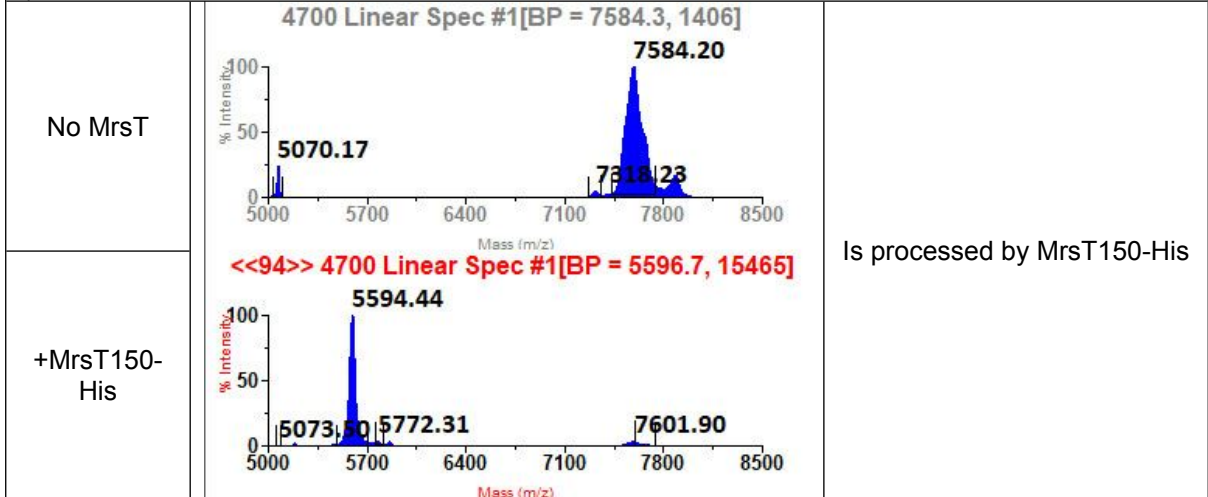

m) ΔGDMEA

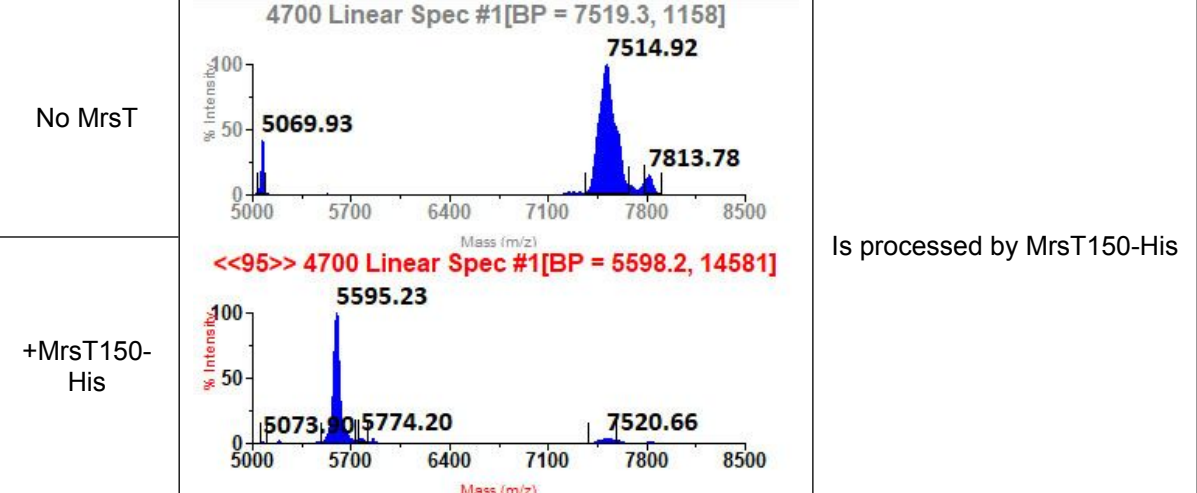

n) ΔGDMEA

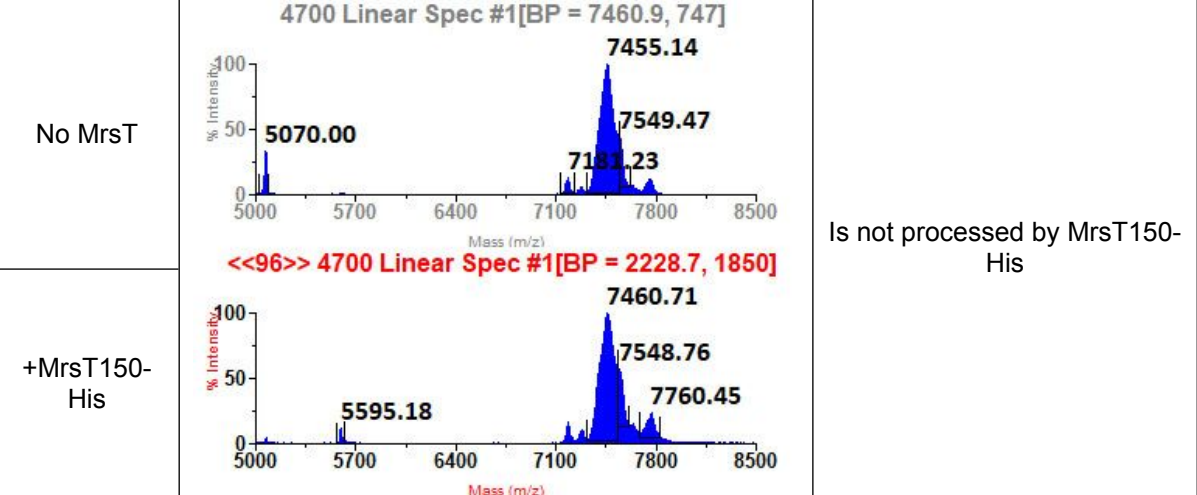

o) ΔA-1

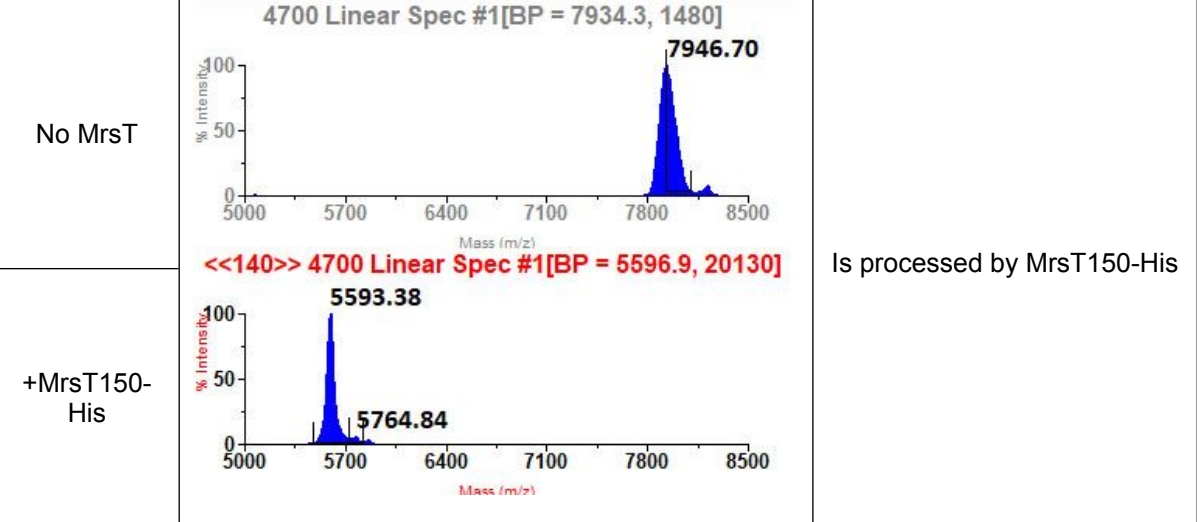

p) ΔG-6

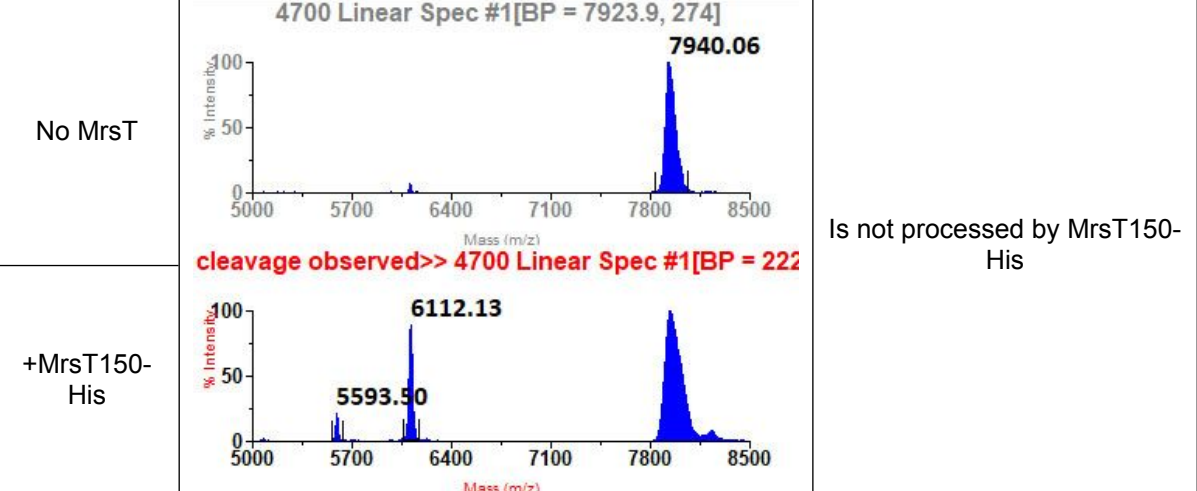

q) ΔK-11

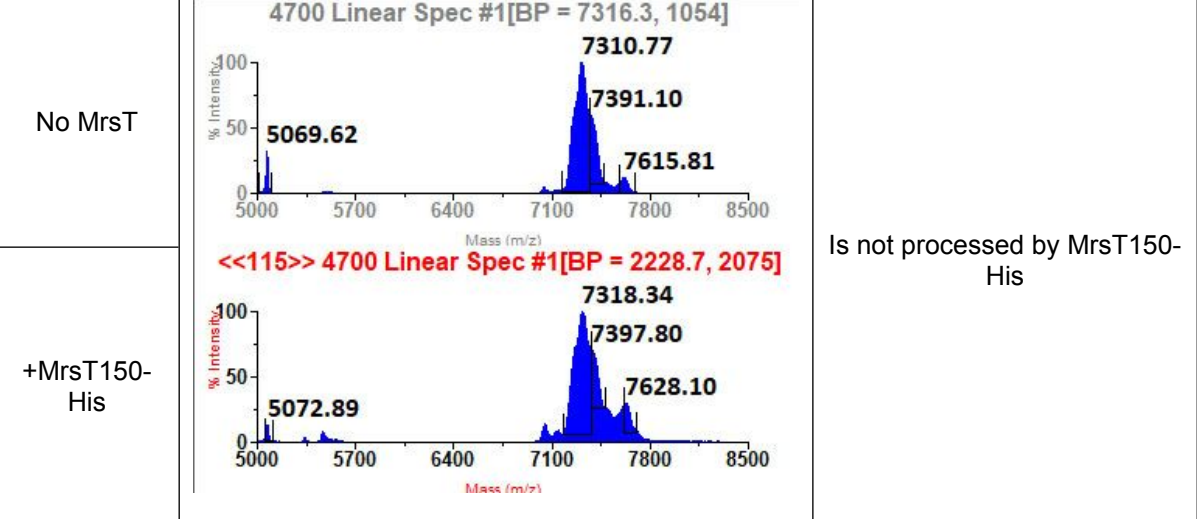

r) ΔE-16

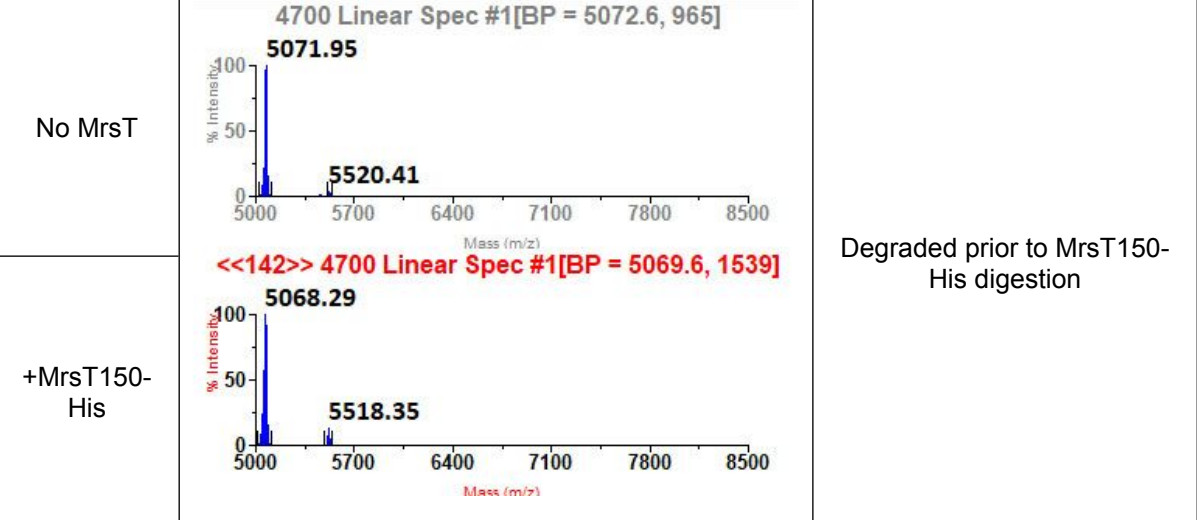

s) ΔF-21

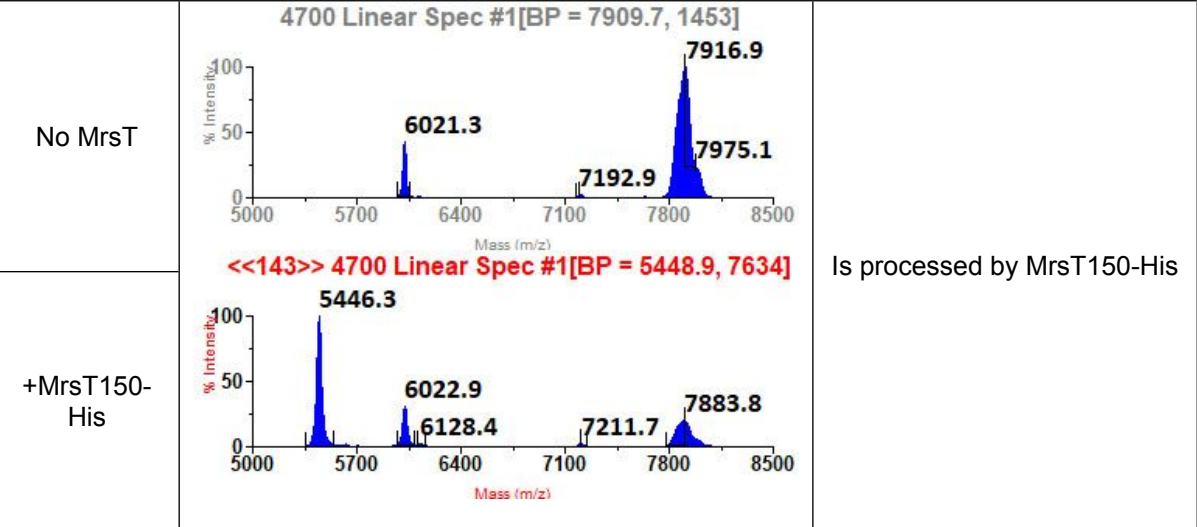

t) K-11A

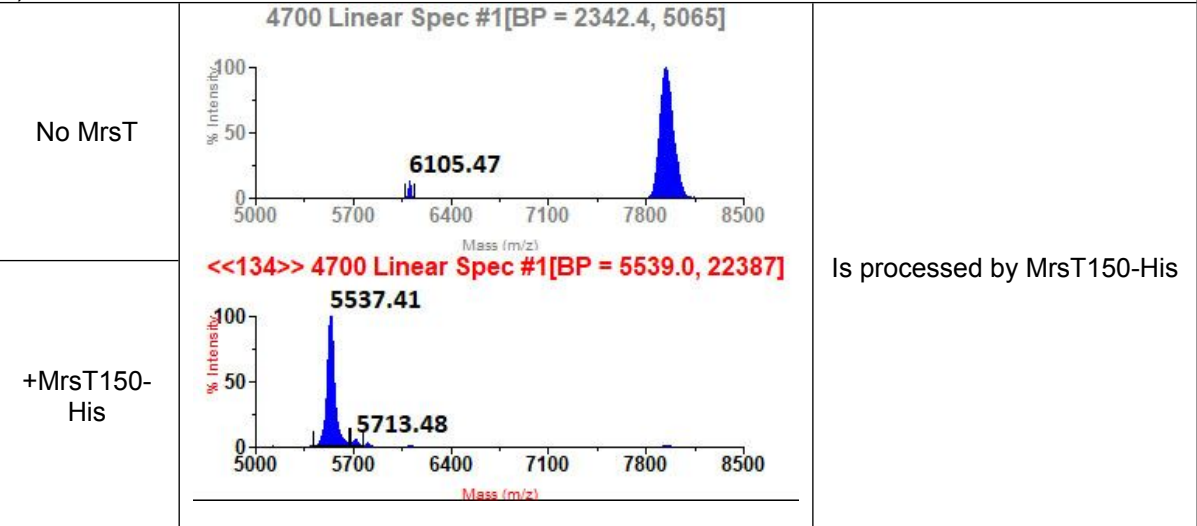

u) E-16A

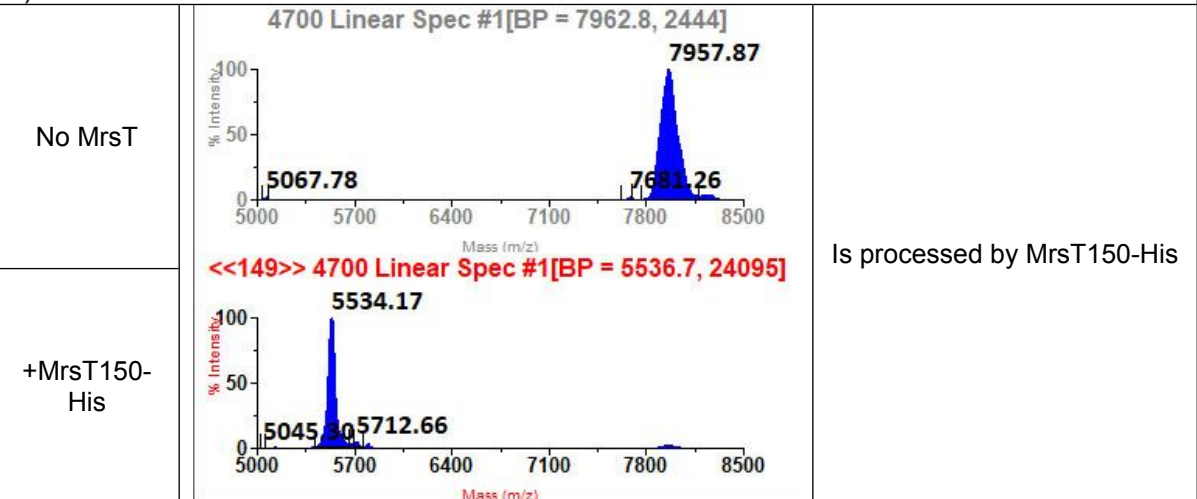

v) F-21A

|                                                    |                                                                                                                                                          |                                    |
|----------------------------------------------------|----------------------------------------------------------------------------------------------------------------------------------------------------------|------------------------------------|
| <p>No MrsT</p>                                     | <p>4700 Linear Spec #1[BP = 7909.3, 995]</p> 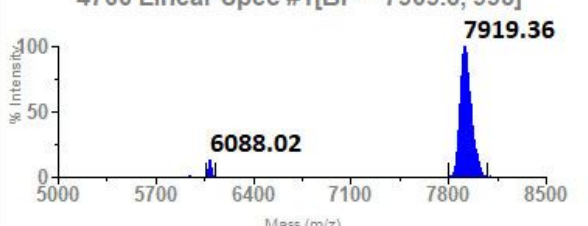                           | <p>Is processed by MrsT150-His</p> |
| <p>+MrsT150-His</p>                                | <p>&lt;&lt;150&gt;&gt; 4700 Linear Spec #1[BP = 5517.1, 4889]</p>       |                                    |
| <p>His6-mersacidin leader without core-peptide</p> |                                                                                                                                                          |                                    |
| <p>No MrsT</p>                                     | <p>4700 Linear Spec #1[BP = 6179.1, 12900]</p>                         | <p>Is processed by MrsT150-His</p> |
| <p>+MrsT150-His</p>                                | <p>&lt;124 1 tenth&gt;&gt; 4700 Linear Spec #1[BP = 5595.5, 187]</p>  |                                    |



## S9. List of primers used in this study

|    | Sequence                                                         | Template                                  | Result                     |
|----|------------------------------------------------------------------|-------------------------------------------|----------------------------|
| fw | GACGGGTCTCCGGCGGCAGCATGTACTTTTACATTGCCTGGTG                      | pACYC His-<br>MrsA +<br>MrsM <sup>1</sup> | pACYC E-3A<br>+ MrsM       |
| rv | GACGGGTCTCCCGCCATGTCTCCCGCACCTACTAACTTATCC                       |                                           |                            |
| fw | GACGGGTCTCCAGCGATGGAAGCAGCATGTACTTTTACATTG                       |                                           | pACYC D-5A<br>+ MrsM       |
| rv | GACGGGTCTCCCGCTCCCGCACCTACTAACTTATCCATTTG                        |                                           |                            |
| fw | GACGGGTCTCCGCAGGCAGCATGTACTTTTACATTGCCTGGTG                      |                                           | pACYC E-3Q<br>+ MrsM       |
| rv | GACGGGTCTCCCTGCATGTCTCCCGCACCTACTAACTTATCC                       |                                           |                            |
| fw | GACGGGTCTCCAAACATGGAAGCAGCATGTACTTTTACATTG                       |                                           | pACYC D-5N<br>+ MrsM       |
| rv | GACGGGTCTCCGTTTCCCGCACCTACTAACTTATCCATTTG                        |                                           |                            |
| fw | GACGGGTCTCCATGGCGGCAGCATGTACTTTTACATTGCCTGGTG                    |                                           | pACYC E-3A<br>D-5A + MrsM  |
| rv | GACGGGTCTCCCATCGCTCCCGCACCTACTAACTTATCCATTTGTG                   |                                           |                            |
| fw | GACGGGTCTCCATGCAGGCAGCATGTACTTTTACATTGCCTGGTG                    |                                           | pACYC E-3Q<br>N-5A + MrsM  |
| rv | GACGGGTCTCCGCATGTTTCCCGCACCTACTAACTTATCCATTTGTG                  |                                           |                            |
| fw | GACGGGTCTCCGAAAGCAGCATGTACTTTTACATTGCCTGGTG                      |                                           | pACYC E-3K<br>+ MrsM       |
| rv | GACGGGTCTCCTTTTCATGTCTCCCGCACCTACTAACTTATCC                      |                                           |                            |
| fw | GACGGGTCTCCAAAGATGGAAGCAGCATGTACTTTTACATTGCCTG                   |                                           | pACYC D-5K<br>+ MrsM       |
| rv | GACGGGTCTCCCTTTCCCGCACCTACTAACTTATCCATTTGTG                      |                                           |                            |
| fw | GACGGGTCTCCAGACATGGAAGCAGCATGTACTTTTACATTGCCTGGTGCGG             |                                           | pACYC<br>AGDMEA +<br>MrsM  |
| rv | GACGGGTCTCCGCTCTCCCGCTGCACCTACTAACTTATCCATTTGTGCTTCTT<br>TCAGCTC |                                           |                            |
| fw | GACGGGTCTCCAAGCAGCAGCGTGTACTTTTACATTGCCTGGTGCGG                  |                                           | pACYC<br>DMEAAA +<br>MrsM  |
| rv | GACGGGTCTCCGCTTCCATGTCCGCACCTACTAACTTATCCATTTGTGCTTC<br>TTTC     |                                           |                            |
| fw | GACGGGTCTCGGAGCATGTACTTTTACATTGCCTGG                             |                                           | pACYC<br>ΔDMEA +<br>MrsM   |
| rv | GACGGGTCTCGGCTCCCGCACCTACTAACTTATCC                              |                                           |                            |
| fw | GACGGGTCTCGGAGCATGTACTTTTACATTGCCTGG                             |                                           | pACYC<br>ΔDMEAA +<br>MrsM  |
| rv | GACGGGTCTCGGATGTACTTTTACATTGCCTGGTG                              |                                           |                            |
| fw | GACGGGTCTCGGAGCATGTACTTTTACATTGCCTGG                             |                                           | pACYC<br>ΔGDMEAA +<br>MrsM |
| rv | GACGGGTCTCGCATCCCGCACCTACTAACTTATCC                              |                                           |                            |
| fw | GACGGGTCTCCCATGTACTTTTACATTGCCTGGTGCGG                           |                                           | pACYC ΔA-1<br>+ MrsM       |
| rv | GACGGGTCTCCCATGCTTCCATGTCTCCCGCACCTAC                            |                                           |                            |
| fw | GACGGGTCTCCCGGACATGGAAGCAGCATGTACTTTTACATTGCC                    |                                           | pACYC ΔG-6<br>+ MrsM       |
| rv | GACGGGTCTCCTCCGCACCTACTAACTTATCCATTTGTGCTTCTTTC                  |                                           |                            |
| fw | GACGGGTCTCCTAGGTGCGTGTACTTTTACATTGCCTGGTGCGG                     |                                           | pACYC ΔK-11<br>+ MrsM      |
| rv | GACGGGTCTCCCCTACTAAATCCATTTGTGCTTCTTTCAGCTCACTGAATG              |                                           |                            |
| fw | GACGGGTCTCCAAGCACAAATGGATAAGTTAGTAGGTGCGGGAG                     |                                           | pACYC ΔE-16<br>+ MrsM      |
| rv | GACGGGTCTCCGCTTTCAGCTCACTGAATGGGTTACCAGCTG                       |                                           |                            |
| fw | GACGGGTCTCCCAAGTGAGCTGAAAGAAGCACAAATGGATAAGTTAGTAG               |                                           | pACYC ΔF-21<br>+ MrsM      |
| rv | GACGGGTCTCCCTTGGGTTACCAGCTGGATTTTGTGTAGAATTTTC                   |                                           |                            |
| fw | GACGGGTCTCCGCGTTAGTAGGTGCGGGAGACATGGAAG                          |                                           | pACYC K-11A<br>+ MrsM      |
| rv | GACGGGTCTCCACGCATCCATTTGTGCTTCTTTCAGCTCACTGAA                    |                                           |                            |
| fw | GACGGGTCTCCAGCGGCACAAATGGATAAGTTAGTAGGTGCGGGAGAC                 |                                           | pACYC E-16A<br>+ MrsM      |
| rv | GACGGGTCTCCCGCTTTCAGCTCACTGAATGGGTTACCAGCTG                      |                                           |                            |
| fw | GACGGGTCTCCAGCGAGTGAGCTGAAAGAAGCACAAATGGATAAGTTAG                |                                           | pACYC F-21A<br>+ MrsM      |
| rv | GACGGGTCTCCCGCTGGGTTACCAGCTGGATTTTGTGTAGAATTTTC                  |                                           |                            |

## References

- (1) Viel, J. H.; Jaarsma, A. H.; Kuipers, O. P. Heterologous Expression of Mersacidin in Escherichia Coli Elucidates the Mode of Leader Processing. *ACS Synth. Biol.* **2021**, *10* (3), 600–608.  
<https://doi.org/10.1021/acssynbio.0c00601>.
